# Supplementary material for: Synthesis and aqueous anion recognition of an imidazolium-based nonacationic cup
Source: Royal Society of Chemistry journal article supplement (doi:10.1039/d1cc05603d), 2021-01-01
Supplement: d1cc05603d1.pdf [file d1cc05603d1.pdf]

## Supporting Information

### Synthesis and Aqueous Anion Recognition of Imidazolium-Based Nonacationic Cup

Pinpin Wang,<sup>a,b</sup> Kai Liu,<sup>c</sup> Huanqing Ma,<sup>b</sup> Hao Nian,<sup>b</sup> Yawen Li,<sup>b</sup> Qingfang Li,<sup>b</sup> Lin Cheng,<sup>b</sup> and Liping Cao<sup>b,\*</sup>

<sup>a</sup>College of Food Science and Pharmaceutical Engineering, Zaozhuang University, Zaozhuang 277160, P. R. China.

<sup>b</sup>College of Chemistry and Materials Science, Northwest University, Xi'an 710069, P. R. China.

<sup>c</sup>Institute of Marine Drugs, Guangxi University of Chinese Medicine, Nanning 530200.

\*E-mail: chcaoliping@nwu.edu.cn

| Table of Contents                                                                              | Pages |
|------------------------------------------------------------------------------------------------|-------|
| General experimental details                                                                   | S2    |
| Synthetic procedures and characterization data                                                 | S2    |
| NMR experiments                                                                                | S5    |
| ESI-MS experiments                                                                             | S10   |
| X-ray structure data of <b>1</b> •9PF <sub>6</sub> <sup>-</sup> and <b>1</b> •9Cl <sup>-</sup> | S13   |
| Recognition experiments between <b>1</b> •9Cl <sup>-</sup> and nucleosides                     | S17   |

## Experimental Procedures

**General Experimental Details.** Starting materials were purchased from commercial suppliers were used without further purification. Melting points were recorded by using a XT-4 apparatus in open capillary tubes. IR spectra were measured on a TENSOR27 spectrometer. NMR spectra were recorded on a spectrometer operating at 400 MHz and 600 MHz for  $^1\text{H}$  NMR, 100 MHz and 150 MHz for  $^{13}\text{C}$  NMR spectra on Bruker ascend<sup>TM</sup> 400 spectrometer, JEOL 400 and JEOL 600 spectrometer. Electrospray Ionization (ESI) mass spectra were acquired with Ultimate 3000 electrospray instrument. Fluorescence spectra were performed by using a Horiba Fluorolog-3 spectrometer and QuantaMaster 8000. Isothermal titration calorimetry (ITC) was carried out using a VP-ITC (Malvern) at 25 °C, and computer fitting of the data were performed using the VP-ITC analyze software. UV/vis spectra were done on Agilent Cary-100 spectrometer. X-ray diffraction data collection of the compounds were recorded by Bruker D8 Venture photon II diffractometer.

## Synthetic Procedures and Characterization Data

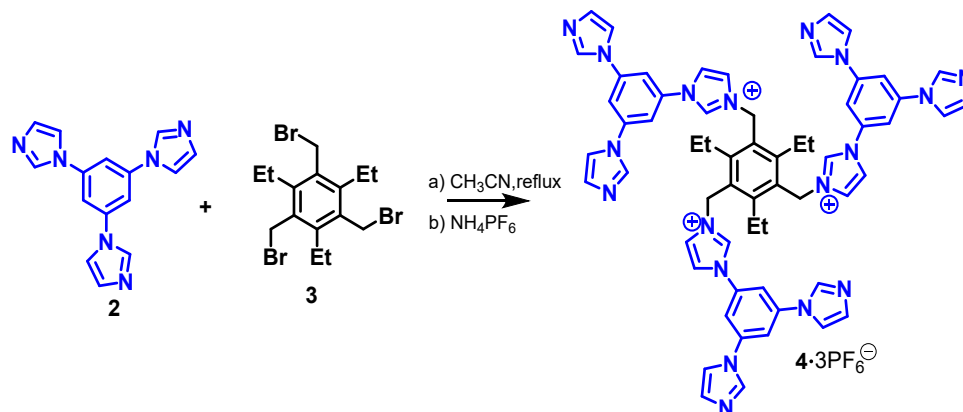

**Compound 4**· $3\text{PF}_6^-$ . **2** (310 mg, 1.12 mmol) was added to dry MeCN (120 mL) in two-necked flask and the suspension was heated at 95°C until all compounds were dissolved. **3** (83 mg, 0.19 mmol) was dissolved in MeCN (20 mL) and slowly added to the solution of **3**, then mixture reacted at 95 °C for another 2 days. The mixture was cooled to room temperature, and the precipitate was collected and washed with an excess amount of acetone ( $3 \times 30$  mL) by centrifuge to give crude product with Br

counterions as a white solid. Crude product was dissolved in H<sub>2</sub>O (20 mL) and excess amount of NH<sub>4</sub>PF<sub>6</sub> was added with stirring for 12 h. The precipitate was collected and washed with an excess amount of H<sub>2</sub>O (3 × 30 mL) to give **4**•3PF<sub>6</sub><sup>-</sup> as a white solid (189 mg, 69%). M.p. > 300 °C. IR (KBr, cm<sup>-1</sup>): 3430w, 1617s, 1556m, 1508m, 1258m, 1190m, 1069m, 842s, 556s. <sup>1</sup>H NMR (400 MHz, CD<sub>3</sub>CN): 8.84 (s, 3H), 8.27 (s, 6H), 7.95-7.90 (m, 6H), 7.77 (d, *J* = 1.8, 6H), 7.68 (s, 6H), 7.52 (t, *J* = 1.8, 3H), 7.27 (s, 6H), 5.62 (s, 6H), 2.76 (q, *J* = 7.3, 6H), 1.14 (t, *J* = 7.3, 9H). <sup>13</sup>C NMR (150 MHz, CD<sub>3</sub>CN): 149.2, 139.3, 136.8, 134.7, 129.3, 128.1, 123.4, 122.4, 118.9, 115.4, 114.2, 48.0, 23.7, 14.8 (only 14 of the 15 resonances expected were observed). ESI-TOF-MS: *m/z* 343.1629 ([**4**•3PF<sub>6</sub><sup>-</sup>-3PF<sub>6</sub><sup>-</sup>]<sup>3+</sup>, calcd. for [C<sub>60</sub>H<sub>57</sub>N<sub>18</sub>]<sup>3+</sup>, 343.1665); 587.2249 ([**4**•3PF<sub>6</sub><sup>-</sup>-2PF<sub>6</sub><sup>-</sup>]<sup>2+</sup>, calcd. for [C<sub>60</sub>H<sub>57</sub>N<sub>18</sub>PF<sub>6</sub>]<sup>2+</sup>, 587.2322).

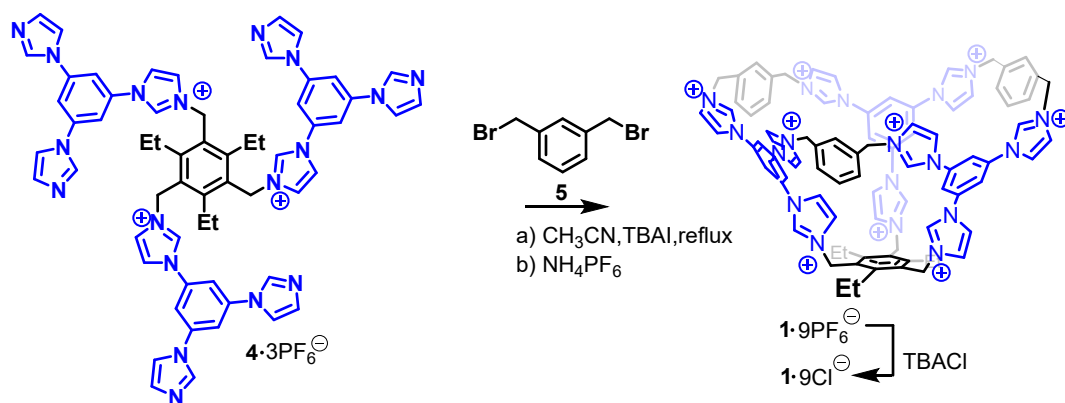

**Compound 1**•9PF<sub>6</sub><sup>-</sup>. **4**•3PF<sub>6</sub><sup>-</sup> (148 mg, 0.101 mmol) and **5** (98 mg, 0.33 mmol) was added to dry MeCN (100 mL) in pressure flask, then mixture reacted at 110 °C for 3 days. The mixture was cooled to room temperature, and the mixture was evaporated by rotation. Crude product was dissolved in H<sub>2</sub>O (30 mL) and excess amount of NH<sub>4</sub>PF<sub>6</sub> was added with stirring for 12 h. The precipitate was collected and washed with an excess amount of H<sub>2</sub>O (3 × 30 mL) to give **1**•9PF<sub>6</sub><sup>-</sup>. The crude product was purified by silica gel chromatography with CH<sub>2</sub>Cl<sub>2</sub>: MeCN (saturated NH<sub>4</sub>PF<sub>6</sub>) = 3:1 (v:v) and washed with an excess amount of H<sub>2</sub>O (3 × 2 mL) to give a white solid (22 mg, 16%). M.p. > 300 °C. IR (KBr, cm<sup>-1</sup>): 3652m, 3432w, 3156m, 1622s, 1553s, 1508m, 1450m, 1181m, 1092m, 838s, 556s. <sup>1</sup>H NMR (400 MHz, CD<sub>3</sub>CN): 8.83 (s, 6H), 8.53 (s, 3H), 7.97 (t, *J* = 1.9, 3H), 7.90 (d, *J* = 1.9, 6H), 7.78 (t, *J* = 1.9, 6H), 7.70-7.55 (m, 21H),

7.46 (s, 3H), 5.56 (s, 6H), 5.47 (d,  $J = 14.7$ , 6H), 5.43 (d,  $J = 14.7$ , 6H), 2.79 (q,  $J = 7.3$ , 6H), 1.26 (t,  $J = 7.3$ , 9H).  $^{13}\text{C}$  NMR (150 MHz,  $\text{CD}_3\text{CN}$ ): 148.6, 148.8, 136.2, 134.8, 133.9, 133.4, 130.6, 130.1, 129.5, 128.0, 124.3, 123.7, 122.7, 121.7, 120.2, 119.0, 53.1, 47.9, 23.5, 14.5. ESI-TOF-MS:  $m/z$  384.3131 ( $[\mathbf{1}\cdot\mathbf{9PF}_6^- - 5\text{PF}_6^-]^{5+}$ , calcd. for  $[\text{C}_{84}\text{H}_{81}\text{N}_{18}\text{P}_4\text{F}_{24}]^{5+}$ , 384.3086); 516.6328 ( $[\mathbf{1}\cdot\mathbf{9PF}_6^- - 4\text{PF}_6^-]^{4+}$ , calcd. for  $[\text{C}_{84}\text{H}_{81}\text{N}_{18}\text{P}_5\text{F}_{30}]^{4+}$ , 516.6270); 737.1642 ( $[\mathbf{1}\cdot\mathbf{9PF}_6^- - 3\text{PF}_6^-]^{3+}$ , calcd. for  $[\text{C}_{84}\text{H}_{81}\text{N}_{18}\text{P}_6\text{F}_{36}]^{3+}$ , 737.1575); 1178.2341 ( $[\mathbf{1}\cdot\mathbf{9PF}_6^- - 2\text{PF}_6^-]^{2+}$ , calcd. for  $[\text{C}_{84}\text{H}_{81}\text{N}_{18}\text{P}_7\text{F}_{42}]^{2+}$ , 1178.2187).

**Compound 1•9Cl.** The solution of  $\mathbf{1}\cdot\mathbf{9PF}_6^-$  (15 mg, 5.6  $\mu\text{mol}$ ) in MeCN (2 mL) was added 20 equiv of tetrabutylammonium chloride hydrate (31 mg, 11.2  $\mu\text{mol}$ ), then the mixture was stirred for another 12h. The precipitate was collected and washed with an excess amount of MeCN ( $3 \times 2$  mL) to give  $\mathbf{1}\cdot\mathbf{8Cl}$  as a white solid (8.7 mg, 83%). M.p.  $> 300$  °C. IR (KBr,  $\text{cm}^{-1}$ ): 3432w, 3074m, 1622s, 1553s, 1484m, 1443m, 1360m, 1333m, 1181s, 1092s, 844m, 755m, 638m.  $^1\text{H}$  NMR (400 MHz,  $\text{D}_2\text{O}$ ): 8.18 (t,  $J = 2.0$ , 3H), 8.08 (d,  $J = 2.0$ , 6H), 8.00 (d,  $J = 2.0$ , 6H), 7.94 (d,  $J = 1.6$ , 3H), 7.88 (d,  $J = 2.0$ , 3H), 7.76 (d,  $J = 1.6$ , 6H), 7.70-7.60 (m, 9H), 7.47 (s, 3H), 5.70 (s, 6H), 5.60 (d,  $J = 14.8$ , 6H), 5.56 (d,  $J = 14.8$ , 6H), 2.86 (q,  $J = 7.3$ , 6H), 1.31 (t,  $J = 7.3$ , 9H) (the resonances for imidazolium  $\text{H}_i$  and  $\text{H}_d$  were disappeared owing to the exchange with D atom in  $\text{D}_2\text{O}$ ).  $^1\text{H}$  NMR (400 MHz,  $\text{DMSO}-d_6$ ): 10.70 (s, 6H), 10.04 (s, 3H), 8.99 (s, 3H), 8.78 (s, 6H), 8.73 (s, 3H), 8.51 (s, 6H), 8.36 (s, 3H), 8.26 (s, 6H), 7.91 (s, 3H), 7.49 (d,  $J = 7.6$ , 6H), 7.51 (t,  $J = 7.6$ , 3H), 5.65 (d,  $J = 14.7$ , 6H), 5.61 (s, 6H), 5.55 (d,  $J = 14.7$ , 6H), 3.00-2.80 (m, 6H), 1.15-1.00 (m, 9H).  $^{13}\text{C}$  NMR (100 MHz,  $\text{CD}_3\text{CN}$ ): 145.9, 134.2, 134.0, 131.1, 127.9, 127.7, 126.0, 125.4, 121.5, 120.8, 120.4, 119.2, 116.9, 115.8, 50.5, 45.2, 21.4, 12.0 (only 18 of the 20 resonances expected were observed). ESI-TOF-MS:  $m/z$  296.7177 ( $[\mathbf{1}\cdot\mathbf{9Cl}^- - 5\text{Cl}^-]^{5+}$ , calcd. for  $[\text{C}_{84}\text{H}_{81}\text{N}_{18}\text{Cl}_4]^{5+}$ , 296.7123); 379.6348 ( $[\mathbf{1}\cdot\mathbf{9Cl}^- - 4\text{Cl}^-]^{4+}$ , calcd. for  $[\text{C}_{84}\text{H}_{81}\text{N}_{18}\text{Cl}_5]^{4+}$ , 379.6326); 517.8205 ( $[\mathbf{1}\cdot\mathbf{9Cl}^- - 3\text{Cl}^-]^{3+}$ , calcd. for  $[\text{C}_{84}\text{H}_{81}\text{N}_{18}\text{Cl}_6]^{3+}$ , 517.1669); 795.2132 ( $[\mathbf{1}\cdot\mathbf{9Cl}^- - 2\text{Cl}^-]^{2+}$ , calcd. for  $[\text{C}_{84}\text{H}_{81}\text{N}_{18}\text{Cl}_7]^{2+}$ , 795.2335).

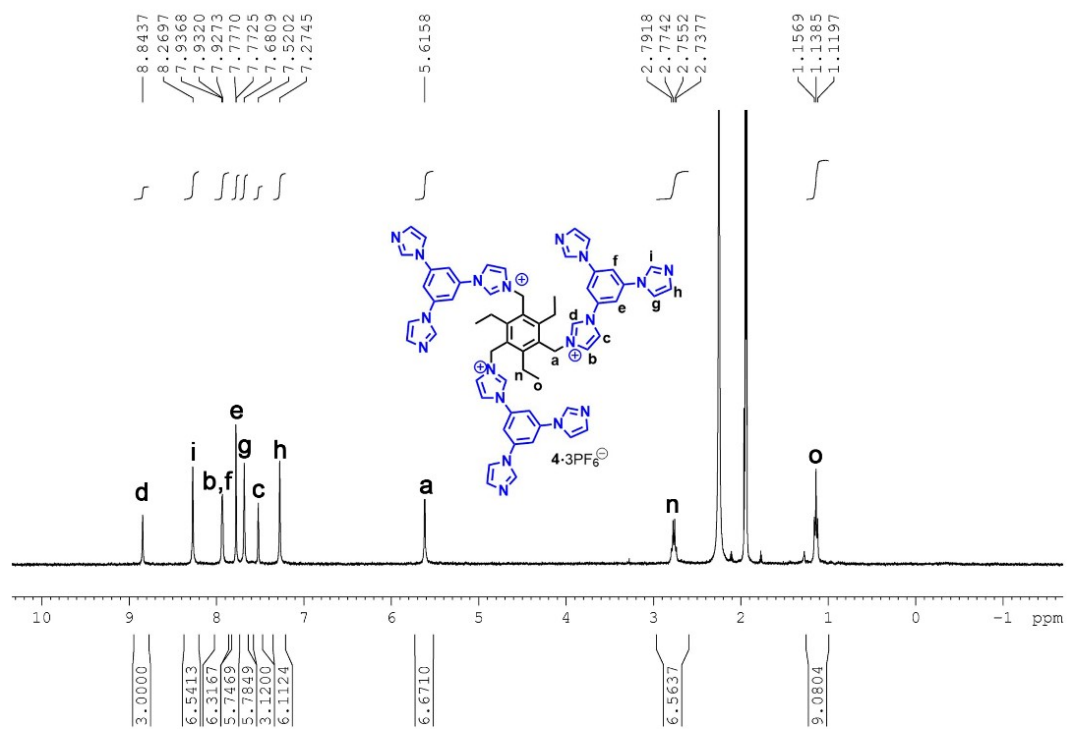

**Fig. S1**  $^1H$  NMR spectrum recorded (400 MHz,  $CD_3CN$ , RT) for  $4 \cdot 3PF_6^-$ .

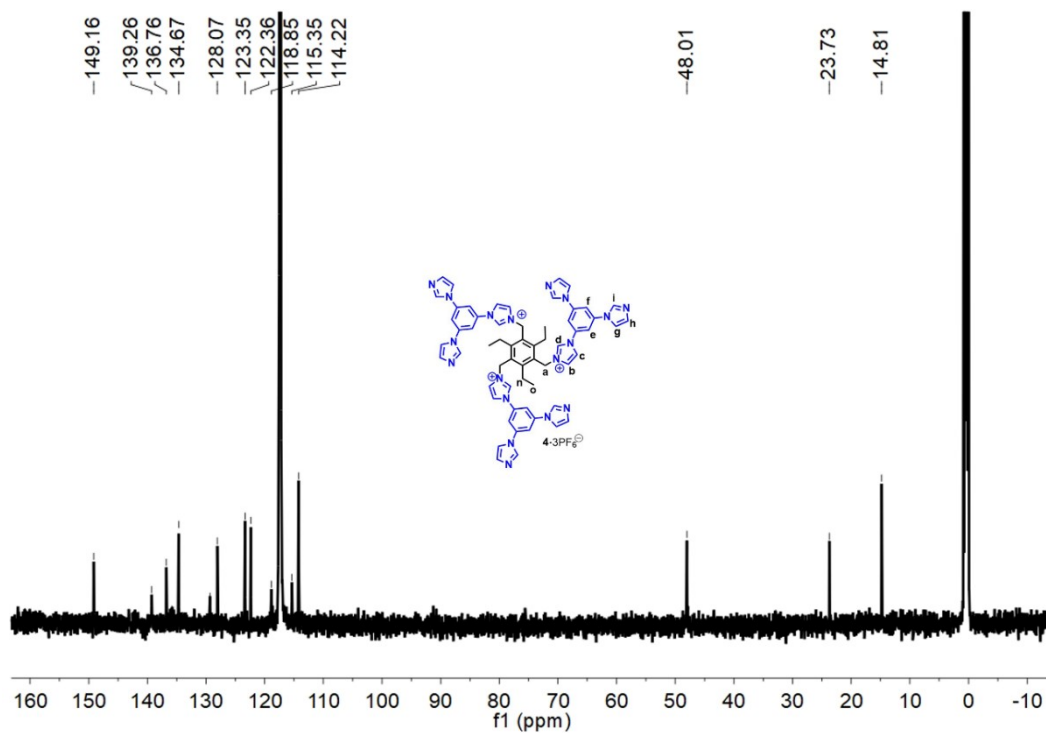

**Fig. S2**  $^{13}C$  NMR spectrum recorded (150 MHz,  $CD_3CN$ , RT) for  $4 \cdot 3PF_6^-$ .

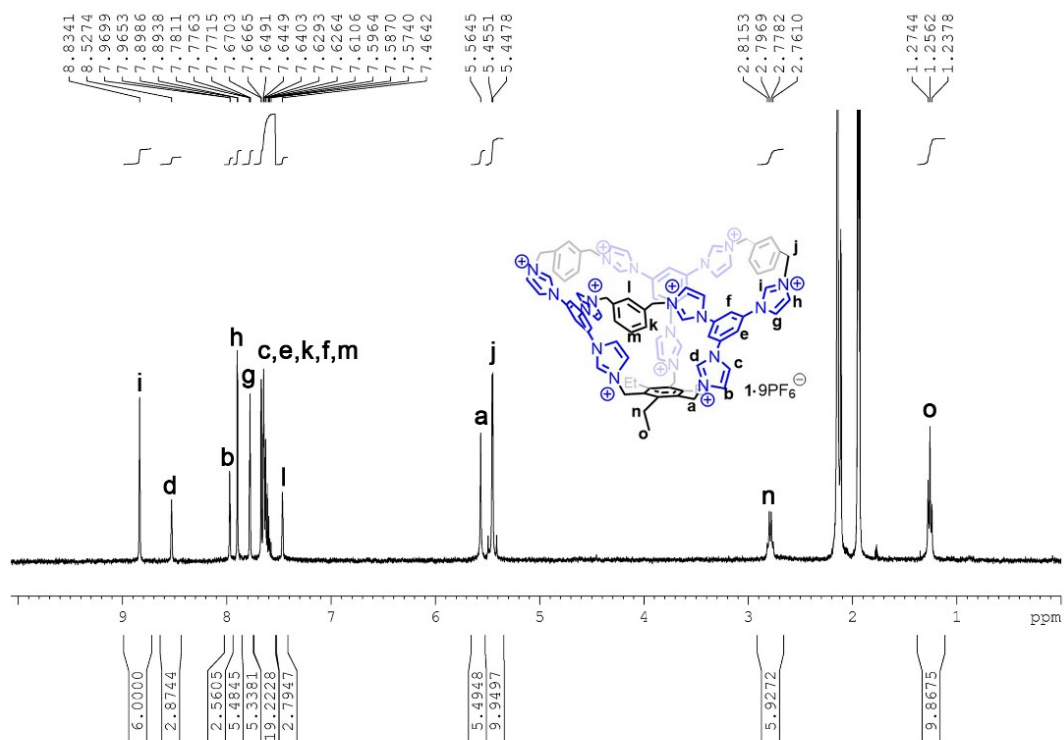

**Fig. S3**  $^1H$  NMR spectrum recorded (400 MHz,  $CD_3CN$ , RT) for  $1\bullet 9PF_6^-$ .

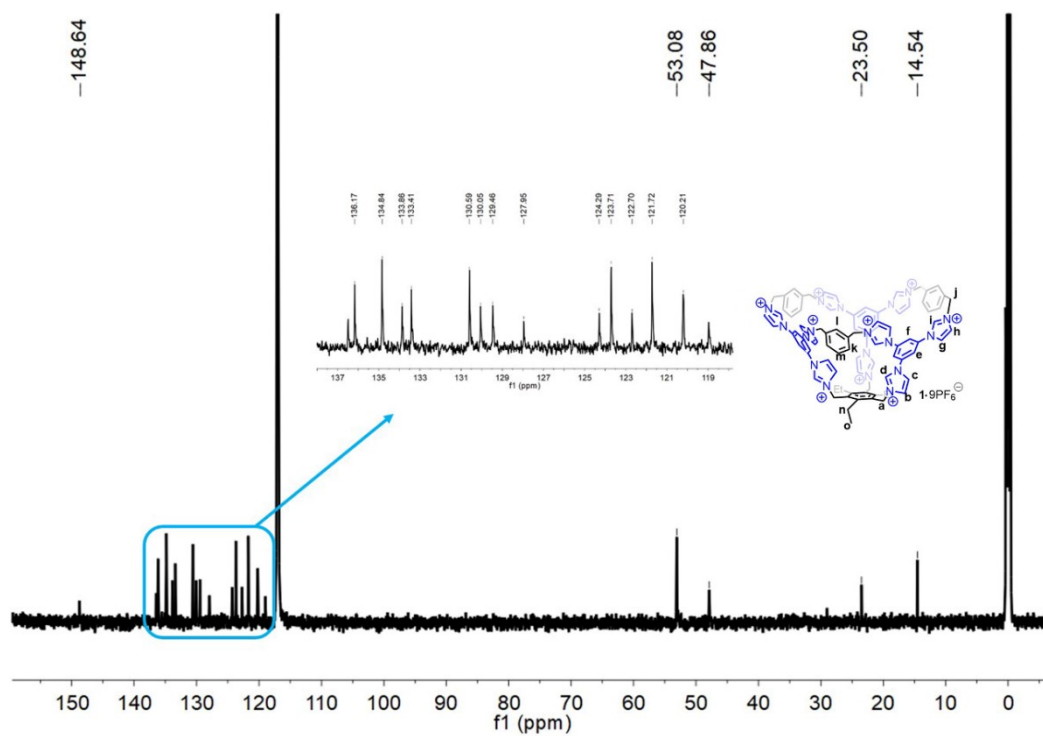

**Fig. S4**  $^{13}C$  NMR spectrum recorded (150 MHz,  $CD_3CN$ , RT) for  $1\bullet 9PF_6^-$ .

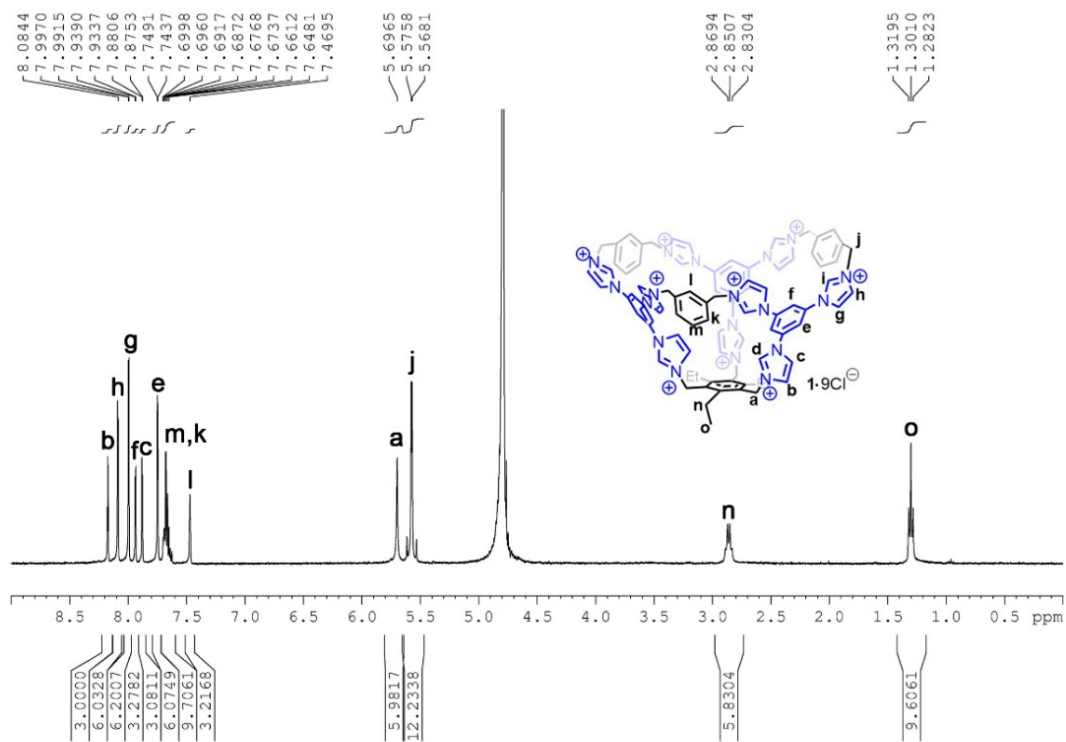

**Fig. S5** <sup>1</sup>H NMR spectrum recorded (400 MHz, D<sub>2</sub>O, RT) for **1•9Cl<sup>-</sup>**.

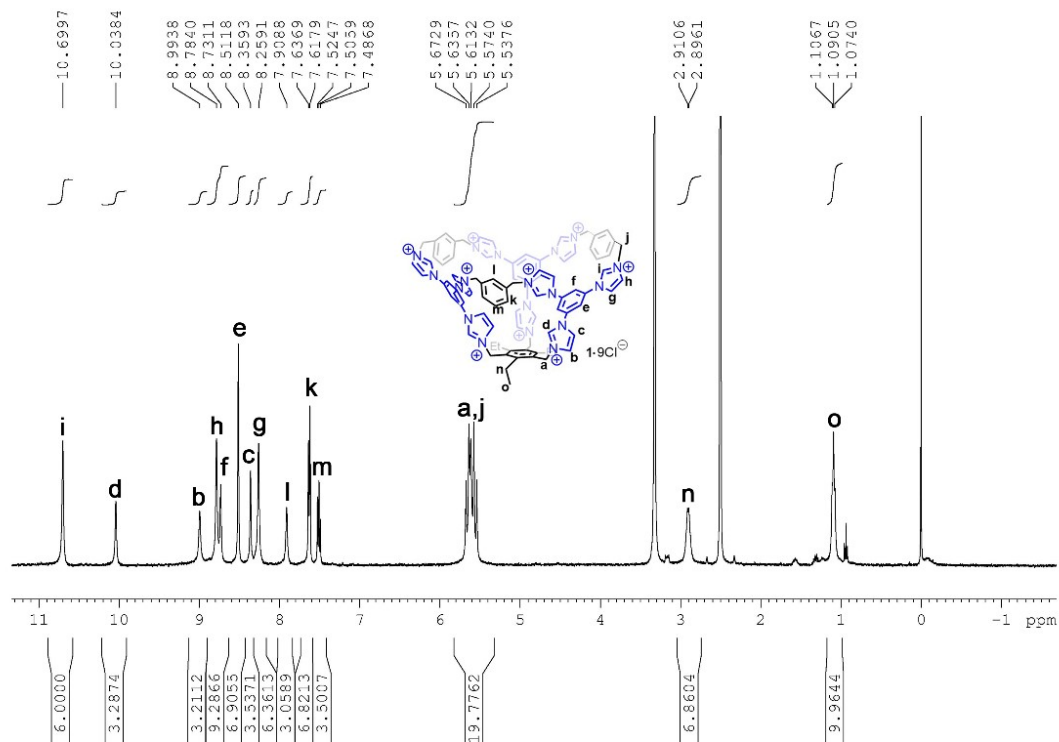

**Fig. S6** <sup>1</sup>H NMR spectrum recorded (400 MHz, DMSO-*d*<sub>6</sub>, RT) for **1•9Cl<sup>-</sup>**.

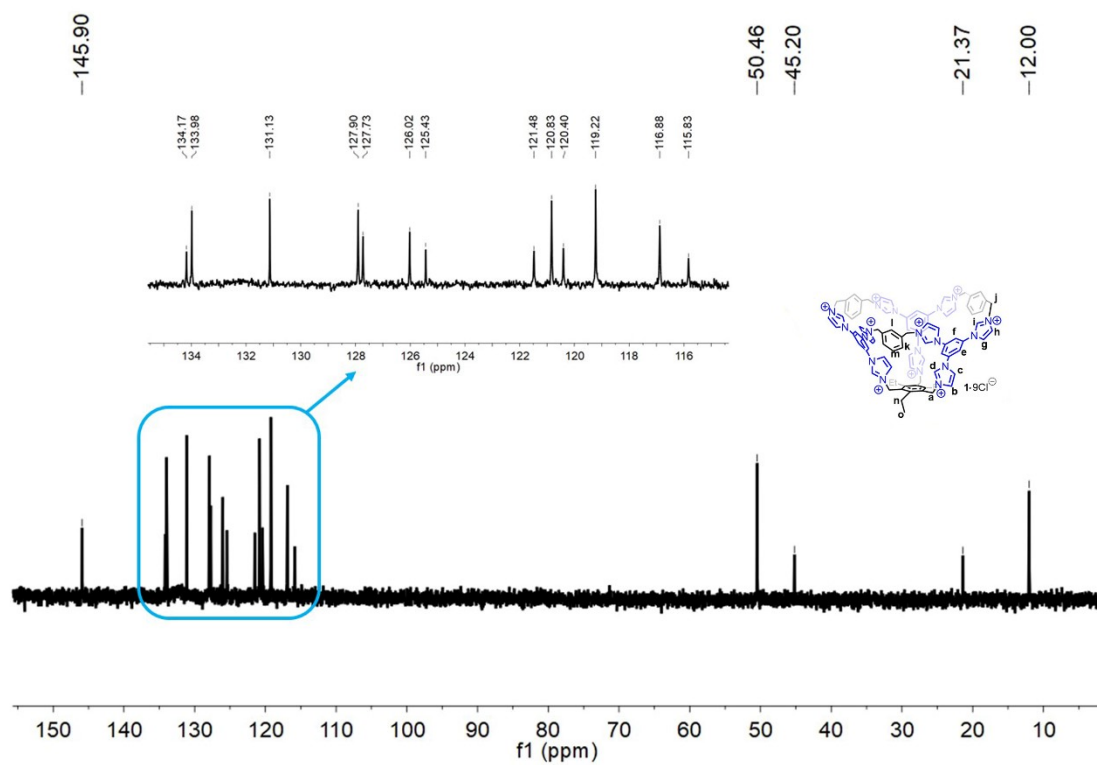

**Fig. S7**  $^{13}\text{C}$  NMR spectrum recorded (100 MHz,  $\text{D}_2\text{O}$ , RT) for  $1\cdot 9\text{Cl}^-$ .

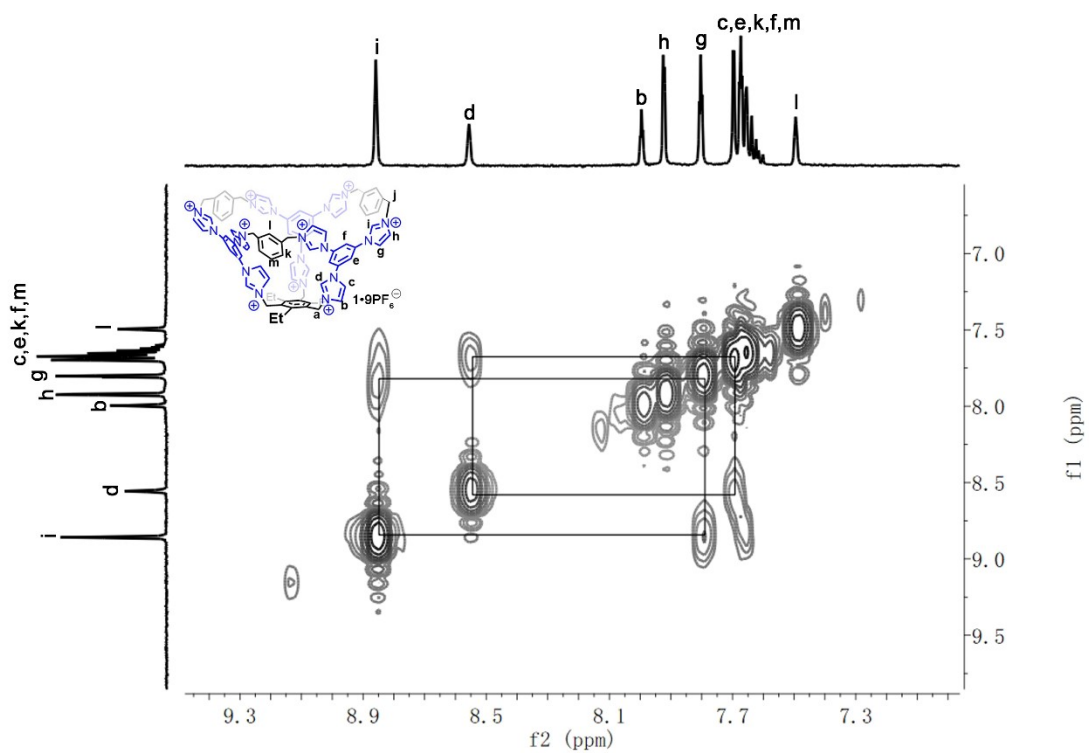

**Fig. S8** COSY spectrum recorded (400 MHz,  $\text{CD}_3\text{CN}$ , RT) for  $1\cdot 9\text{PF}_6^-$ .



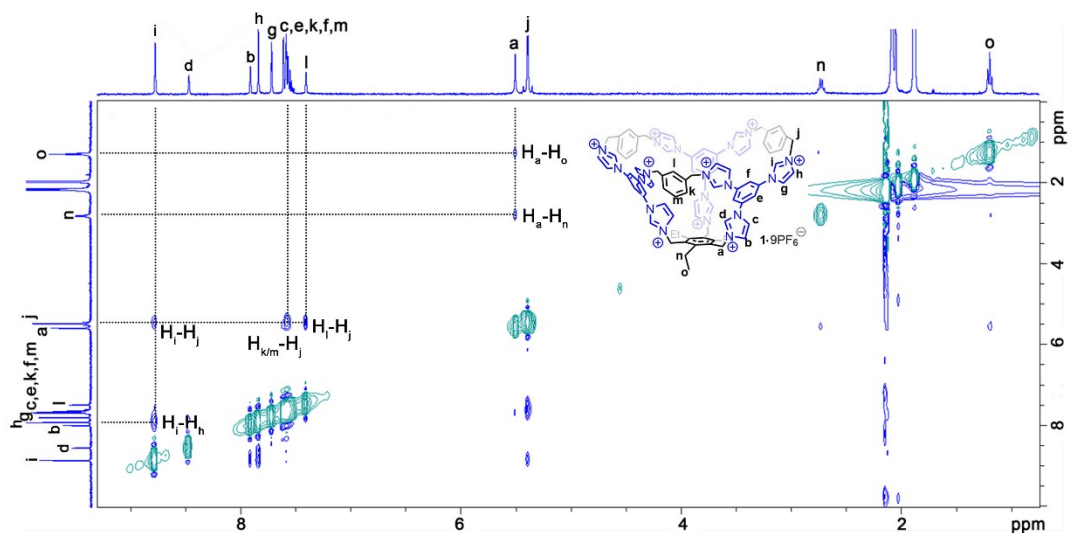

**Fig. S9** NOESY spectrum recorded (400 MHz, CD<sub>3</sub>CN, RT) for **1•9PF<sub>6</sub><sup>-</sup>**.

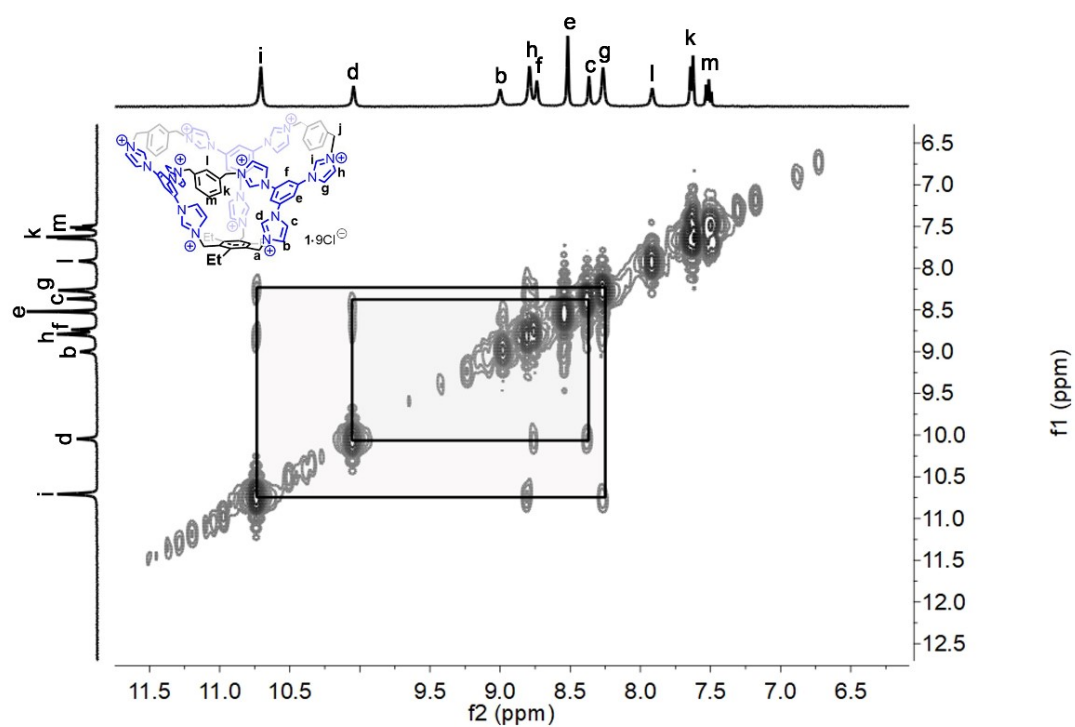

**Fig. S10** COSY spectrum recorded (400 MHz, DMSO-*d*<sub>6</sub>, RT) for **1•9Cl<sup>-</sup>**.

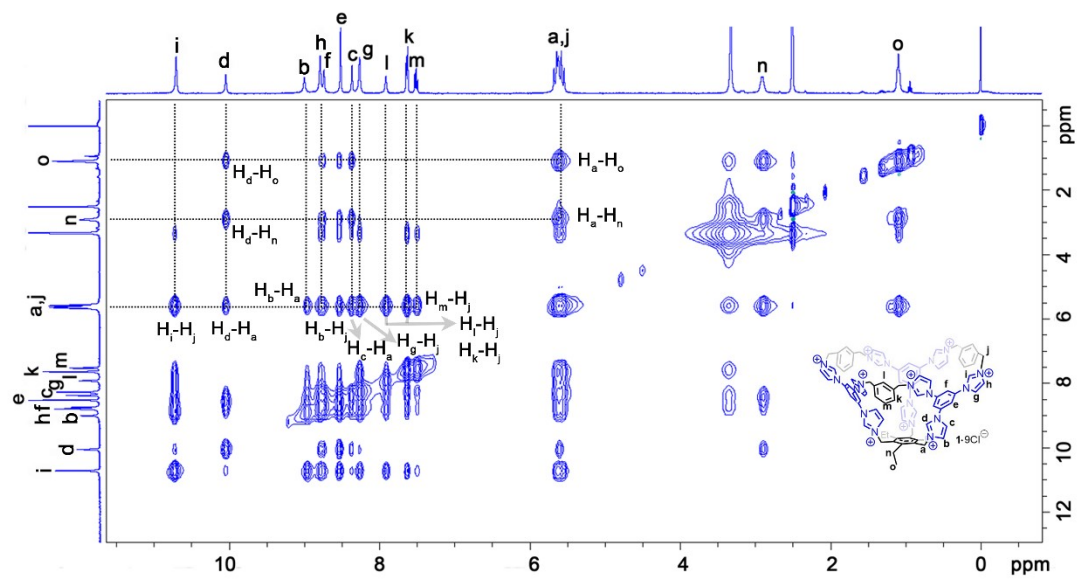

Fig. S11 NOESY spectrum recorded (400 MHz, DMSO- $d_6$ , RT) for  $1 \cdot 9Cl^-$ .

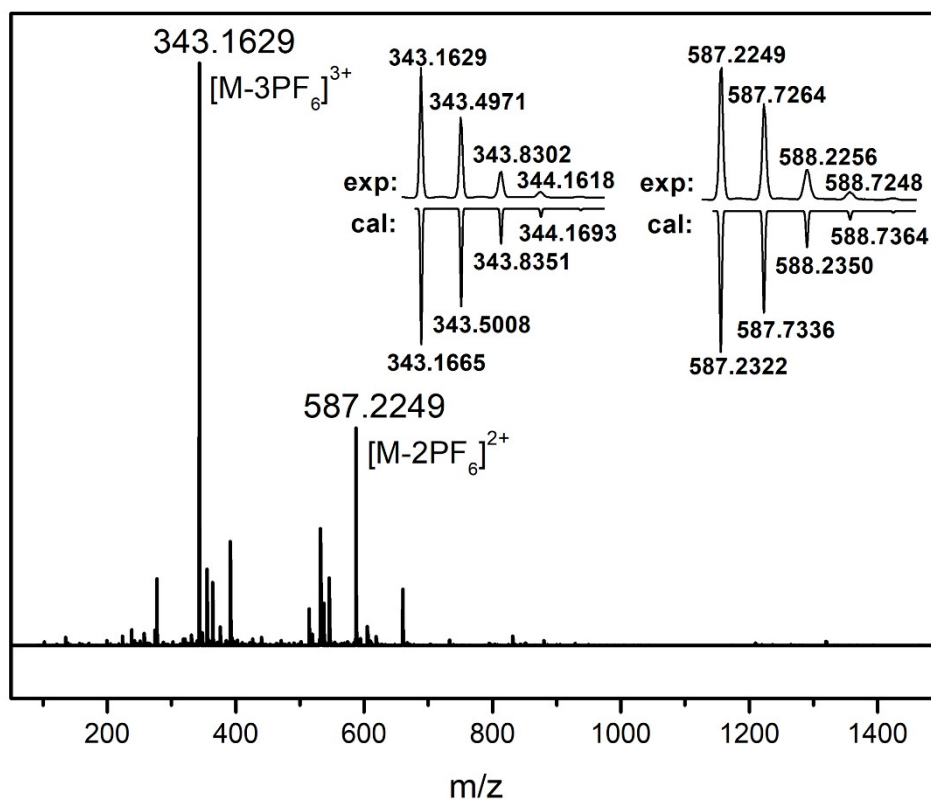

Fig. S12 ESI-MS spectrum of  $4 \cdot 3PF_6^-$ .

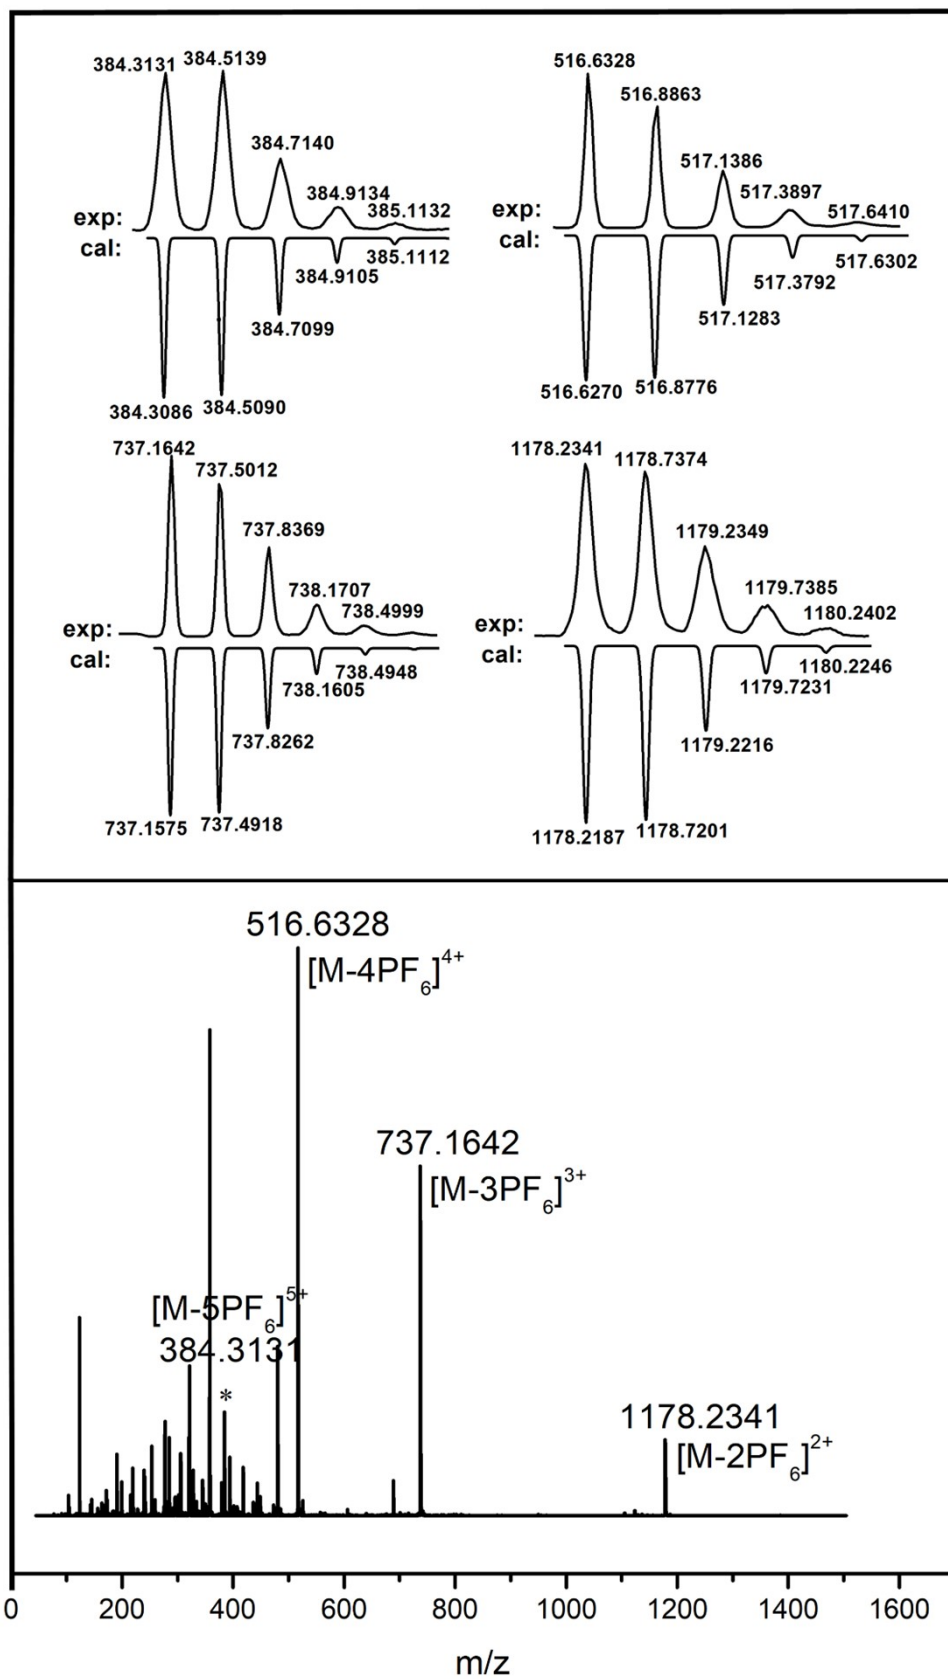

Fig. S13 ESI-MS spectrum of  $1 \cdot 9PF_6^-$ .

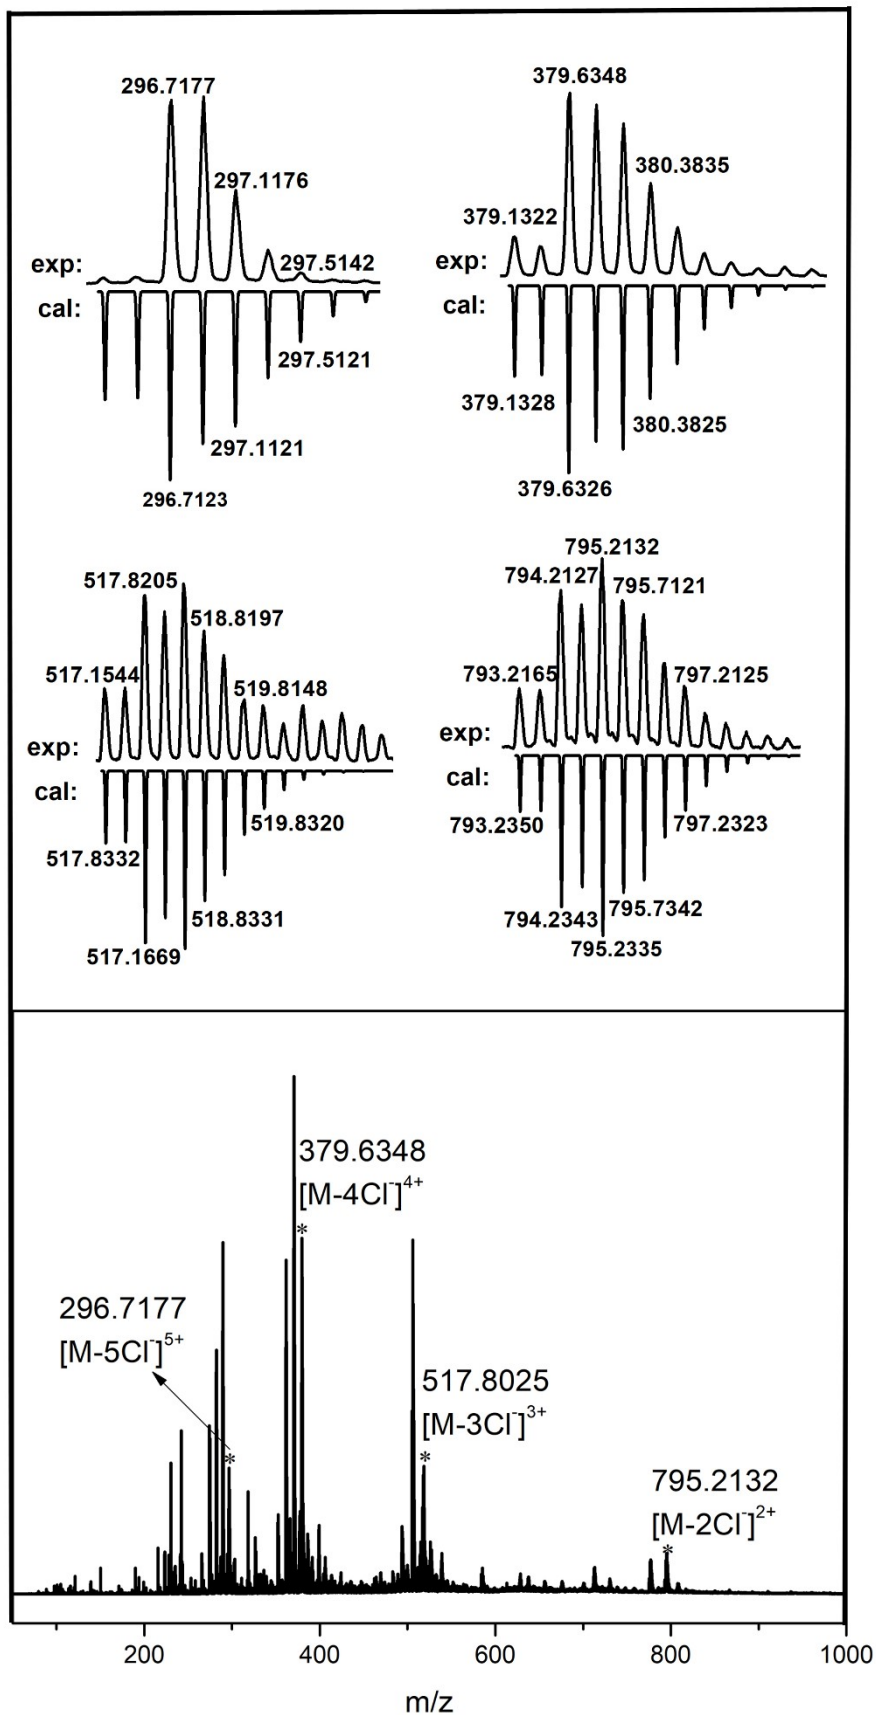

Fig. S14 ESI-MS spectrum of  $1 \cdot 9\text{Cl}^-$ .

## X-ray Structure determination

X-ray diffraction data collection of the compounds were recorded by Bruker VENTURE system with PHOTON II CPAD detector equipped at 150 K and a Ga-target Liquid METALJET D2 PLUS X-ray Source ( $\lambda = 1.34139 \text{ \AA}$ ). The structure was solved by SHELXT (version 2018/2) and refined by full-matrix least-squares procedures using the SHELXL program (version 2018/3) through the OLEX2 graphical interface.

**1**•9PF<sub>6</sub><sup>-</sup> (2.67 mg, 0.5 mmol) was dissolved in CH<sub>3</sub>CN (2 mL) and the solution was passed through a 0.45  $\mu\text{m}$  filter into a 10 mL tube, which was placed inside a 500 mL wild-mouth bottle containing dichloromethane (50 mL). The bottle was capped, after slow evaporation of dichloromethane at 5°C into the CH<sub>3</sub>CN solution for 7 day, and colorless single crystals of **1**•9PF<sub>6</sub><sup>-</sup> were obtained.

**1**•9Cl<sup>-</sup> (1.68 mg, 0.5 mmol) was dissolved in MeOH (2 mL) and the solution was passed through a 0.45  $\mu\text{m}$  filter into a 10 mL tube, which was placed inside a 500 mL wild-mouth bottle containing dichloromethane (50 mL). The bottle was capped, after slow evaporation of dichloromethane at 5°C into the MeOH solution for 7 day, and colorless single crystals of **1**•9Cl<sup>-</sup> were obtained.

**Table S1.** Crystal data and structure refinement for **1**•9Cl<sup>-</sup>

|                                 |                                                                                                                                           |
|---------------------------------|-------------------------------------------------------------------------------------------------------------------------------------------|
| Empirical formula               | C117 H131 Cl2 F54 N34 P9                                                                                                                  |
| Formula weight                  | 3389.18                                                                                                                                   |
| Temperature                     | 90 K                                                                                                                                      |
| Wavelength                      | 1.34138 Å                                                                                                                                 |
| Crystal system, space group     | Triclinic, P-1                                                                                                                            |
| Unit cell dimensions            | a = 15.8416(16) Å $\alpha = 95.115(4)^\circ$<br>b = 16.8382(17) Å $\beta = 99.575(3)^\circ$<br>c = 27.118(3) Å $\gamma = 94.411(4)^\circ$ |
| Volume                          | 7073.2(12) Å <sup>3</sup>                                                                                                                 |
| Z, Calculated density           | 2, 1.591 Mg/m <sup>3</sup>                                                                                                                |
| Absorption coefficient          | 1.658 mm <sup>-1</sup>                                                                                                                    |
| F (000)                         | 3452.0                                                                                                                                    |
| Crystal size                    | 0.16 × 0.14 × 0.09 mm                                                                                                                     |
| Theta range for data collection | 2.588 to 55.181°                                                                                                                          |

|                                    |                                             |
|------------------------------------|---------------------------------------------|
| Limiting indices                   | -19<=h<=19, -20<=k<=20, -33<=l<=32          |
| Reflections collected / unique     | 150955 / 26946 [R(int) = 0.0587]            |
| Completeness to $\theta = 53.594$  | 99.7 %                                      |
| Absorption correction              | Semi-empirical from equivalents             |
| Max. and min. transmission         | 0.7632 and 0.6132                           |
| Refinement method                  | Full-matrix least-squares on F <sup>2</sup> |
| Data / restraints / parameters     | 26946 / 4774 / 2084                         |
| Goodness-of-fit on F <sup>2</sup>  | 1.031                                       |
| Final R indices [I>2 $\sigma$ (I)] | R1 = 0.0775, wR2 = 0.2128                   |
| R indices (all data)               | R1 = 0.0860, wR2 = 0.2193                   |
| Extinction coefficient             | n/a                                         |
| Largest diff. peak and hole        | 1.303 and -0.698 e. Å <sup>-3</sup>         |

**Table S2.** Crystal data and structure refinement for **1•9Cl<sup>-</sup>**

|                                   |                                                                                                                             |
|-----------------------------------|-----------------------------------------------------------------------------------------------------------------------------|
| Empirical formula                 | C <sub>93</sub> H <sub>99</sub> Cl <sub>27</sub> N <sub>18</sub>                                                            |
| Formula weight                    | 2426.05                                                                                                                     |
| Temperature                       | 150(2) K                                                                                                                    |
| Wavelength                        | 1.34139 Å                                                                                                                   |
| Crystal system, space group       | Monoclinic, P 1 21/n 1                                                                                                      |
| Unit cell dimensions              | a = 16.3833(6) Å $\alpha = 90^\circ$<br>b = 20.8000(8) Å $\beta = 95.615(2)^\circ$<br>c = 37.6802(15) Å $\gamma = 90^\circ$ |
| Volume                            | 12778.8(8) Å <sup>3</sup>                                                                                                   |
| Z, Calculated density             | 4, 1.261 Mg/m <sup>3</sup>                                                                                                  |
| Absorption coefficient            | 3.686 mm <sup>-1</sup>                                                                                                      |
| F (000)                           | 4968                                                                                                                        |
| Crystal size                      | 0.4 × 0.3 × 0.2 mm                                                                                                          |
| Theta range for data collection   | 2.050 to 52.998°                                                                                                            |
| Limiting indices                  | -19<=h<=19, -24<=k<=24, -44<=l<=44                                                                                          |
| Reflections collected / unique    | 185754 / 22518 [R(int) = 0.1921]                                                                                            |
| Completeness to $\theta = 53.594$ | 99.6 %                                                                                                                      |
| Absorption correction             | Semi-empirical from equivalents                                                                                             |
| Max. and min. transmission        | 0.7365 and 0.4620                                                                                                           |
| Refinement method                 | Full-matrix least-squares on F <sup>2</sup>                                                                                 |
| Data / restraints / parameters    | 22518 / 1 / 1027                                                                                                            |
| Goodness-of-fit on F <sup>2</sup> | 1.686                                                                                                                       |

|                                      |                                     |
|--------------------------------------|-------------------------------------|
| Final R indices [ $I > 2\sigma(I)$ ] | R1 = 0.1187, wR2 = 0.3759           |
| R indices (all data)                 | R1 = 0.1274, wR2 = 0.3936           |
| Extinction coefficient               | n/a                                 |
| Largest diff. peak and hole          | 1.698 and -1.157 e. Å <sup>-3</sup> |

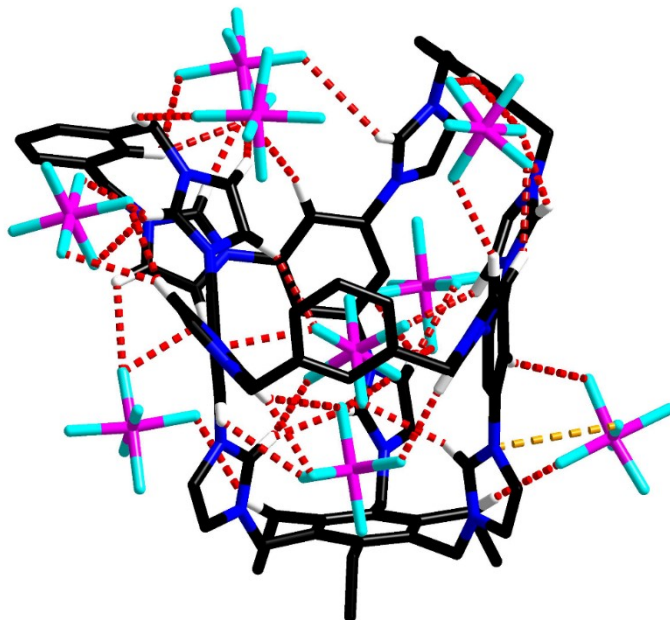

**Fig. S15** The C–H $\cdots$ F<sup>-</sup> (2.217–2.896 Å) and N<sup>+</sup> $\cdots$ F<sup>-</sup> (3.465 Å) interactions between F ions and the acidic CH/positive-charged N<sup>+</sup> of imidazolium groups in the X-ray crystal structure of **1**•9PF<sub>6</sub><sup>-</sup>. Dash line: Hydrogen bonds (red) and electrostatic interactions (yellow).

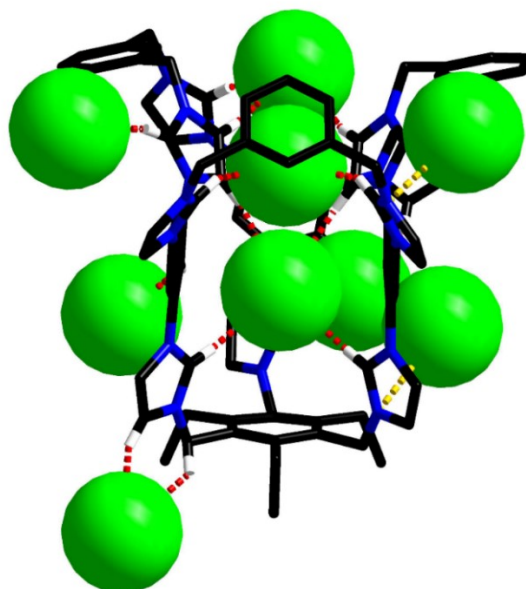

**Fig. S16** The C–H $\cdots$ Cl<sup>-</sup> and N<sup>+</sup> $\cdots$ Cl<sup>-</sup> interactions between Cl ions and the acidic CH/positive-charged N<sup>+</sup> of imidazolium groups in the X-ray crystal structure of **1**•9Cl<sup>-</sup>. Dash line: Hydrogen bonds (red) and electrostatic interactions (yellow).

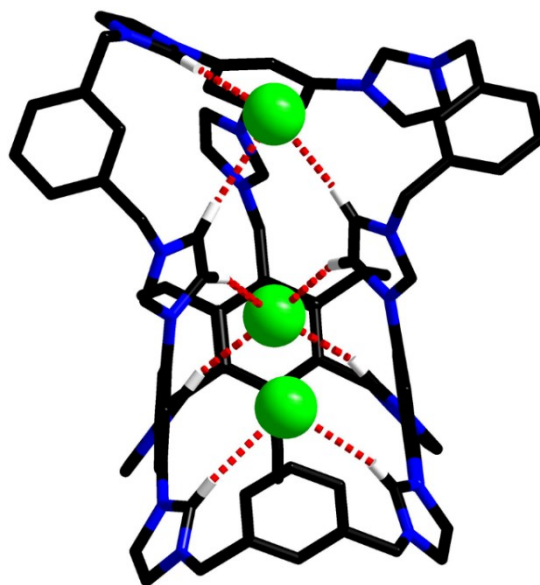

**Fig. S17** The C–H···Cl<sup>−</sup> interactions between Cl<sup>−</sup> ions and the acidic CH of imidazolium groups in the X-ray crystal structure of **1**•9Cl<sup>−</sup>. Dash line: Hydrogen bonds (red).

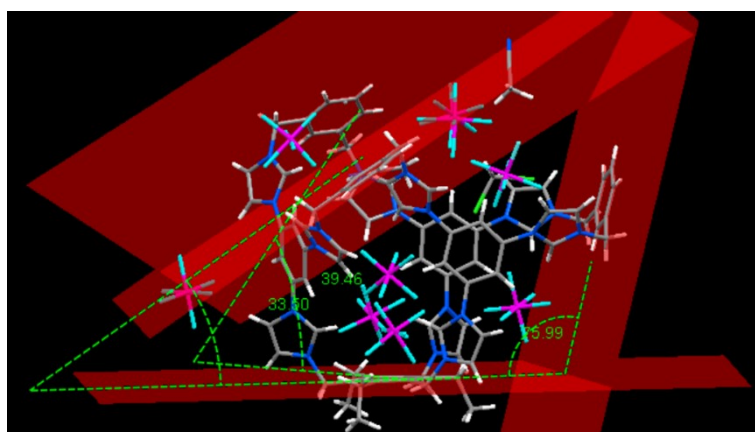

**Fig. S18** The angle of three benzene rings in the X-ray crystal structure of **1**•9PF<sub>6</sub><sup>−</sup>.

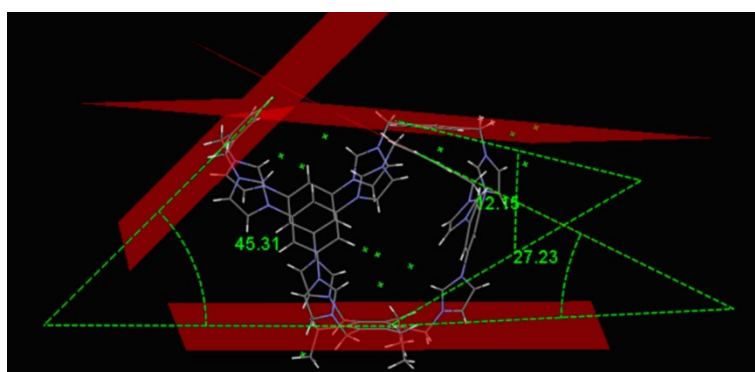

**Fig. S19** The angle of three benzene rings in the X-ray crystal structure of **1**•9Cl<sup>−</sup>.



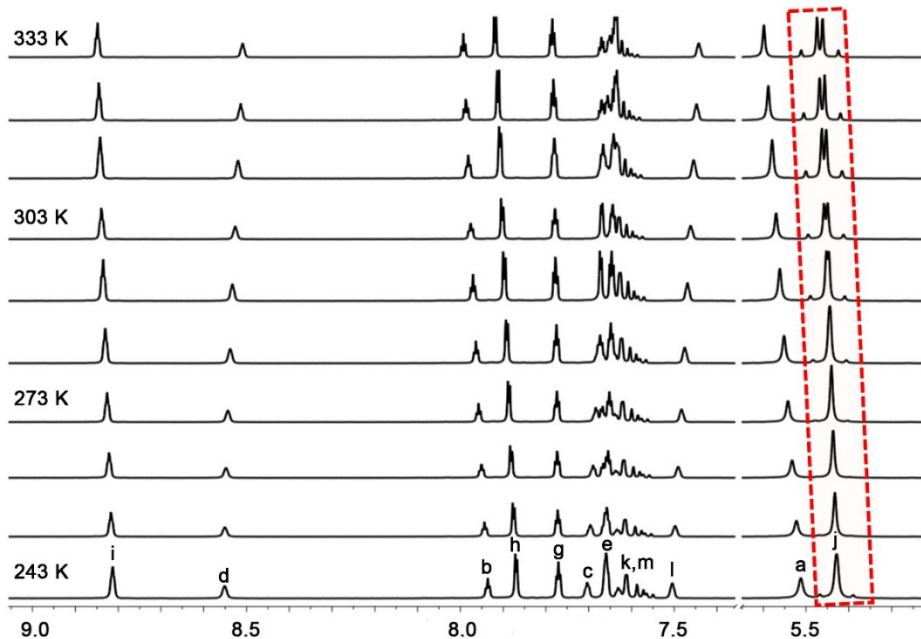

**Fig S20.**  $^1\text{H}$  NMR spectrum (400 MHz,  $\text{CD}_3\text{CN}$ , 243K-333K) of  $1\cdot 9\text{PF}_6^-$ .

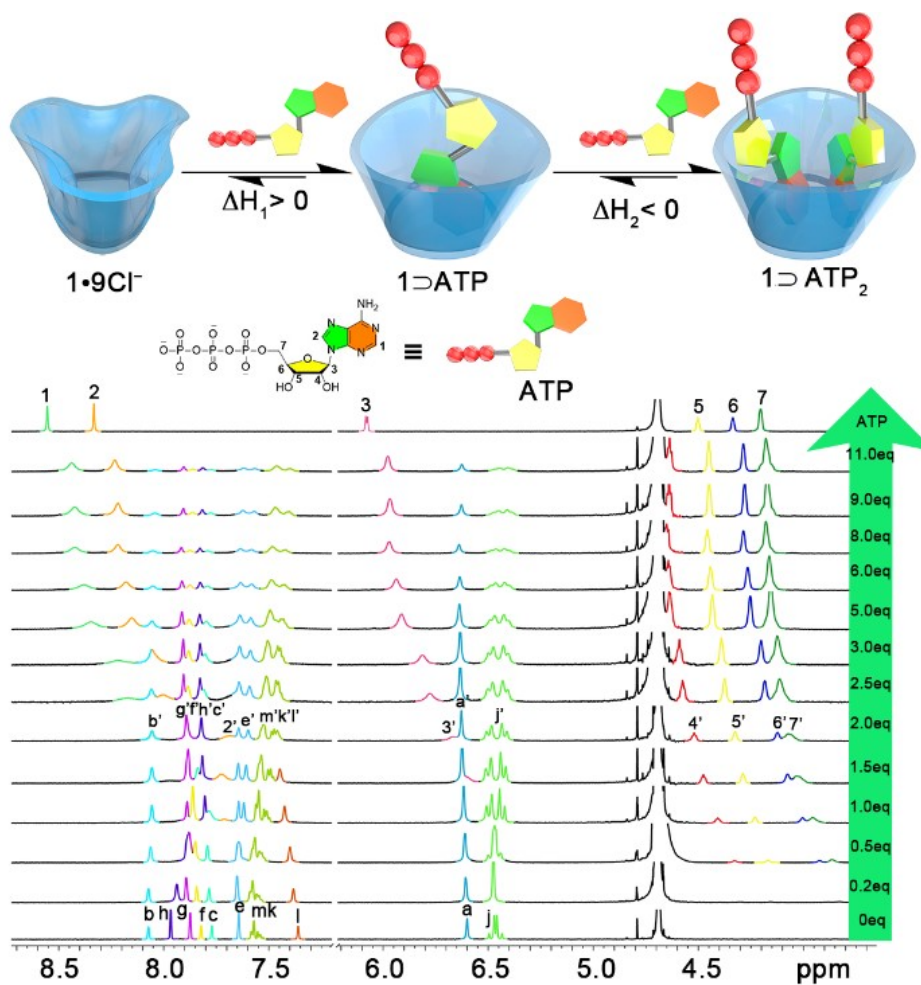

**Fig. S21**  $^1\text{H}$  NMR titration (600 MHz, RT,  $\text{D}_2\text{O}$ ) of  $1\cdot 9\text{Cl}^-$  (1.0 mM) titrated by ATP (0-11.0 equiv).

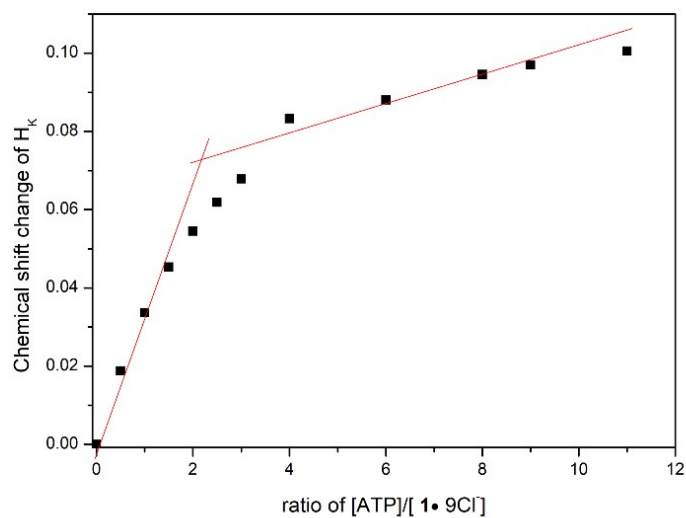

**Fig S22.** The variation curve of chemical shift for the complexation between  $1\cdot 9Cl^-$  and ATP from  $^1H$  NMR spectrum, indicating a 1:2 stoichiometry.

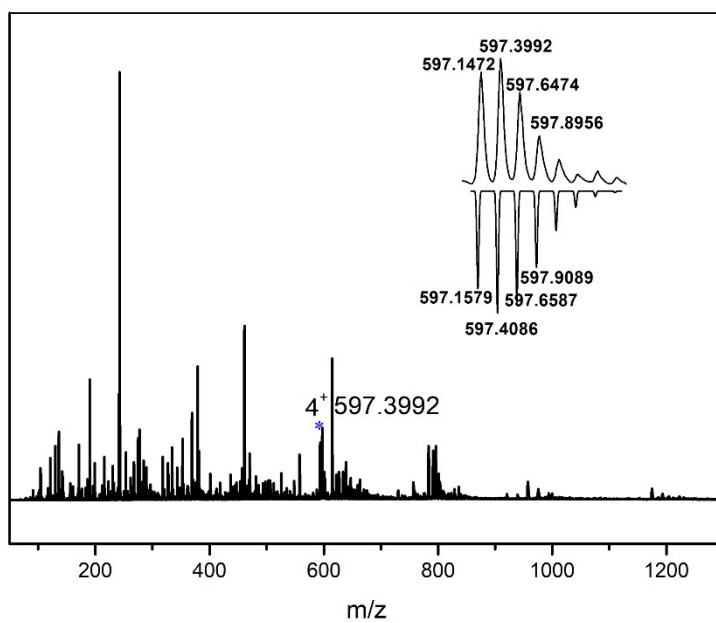

**Fig S23.** ESI-MS spectrum of  $1\cdot 9Cl^-(ATP)_2$ .

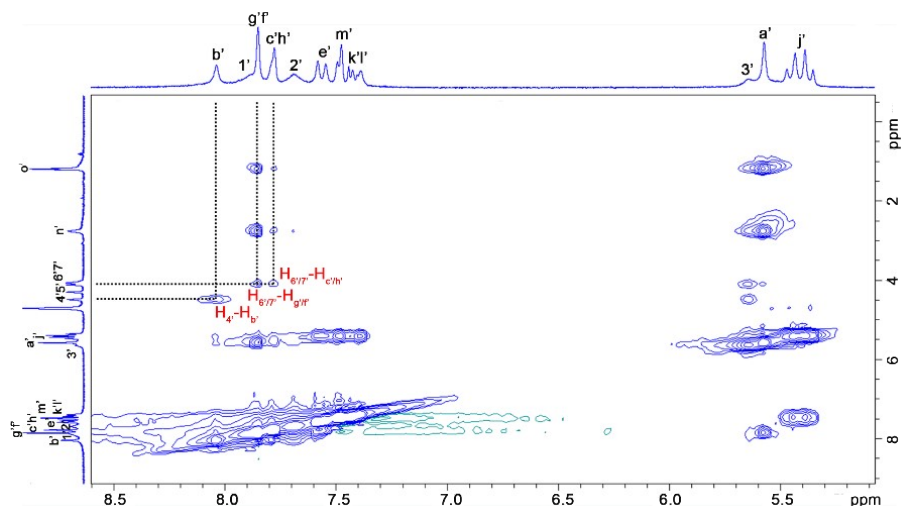

**Fig. S24** NOESY spectrum (400 MHz, RT, D<sub>2</sub>O) of 1⊃ATP<sub>2</sub> ([1•9Cl<sup>-</sup>]:[ATP] = 1:2).

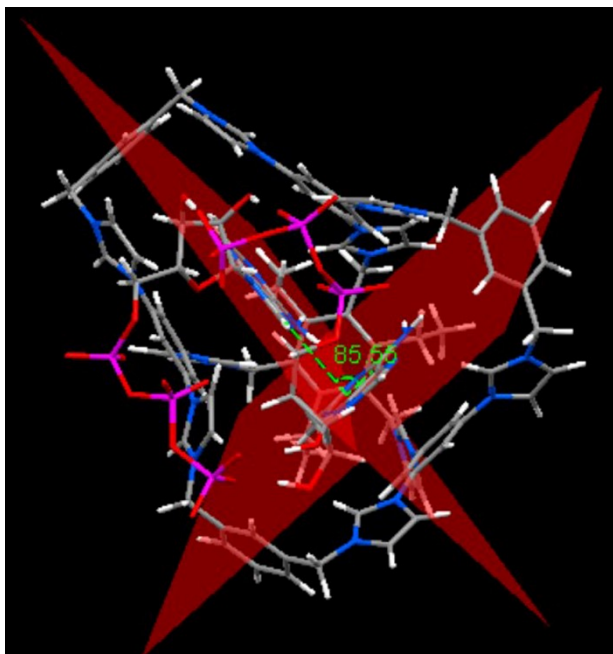

**Fig. S25** The plane angle between two adenine groups of ATP in the energy-minimized structure of 1⊃ATP<sub>2</sub>. Structure was optimized using DFT B3LYP-D3(BJ)/6-31G(d) with the default solvation model in water by Gaussian 16.

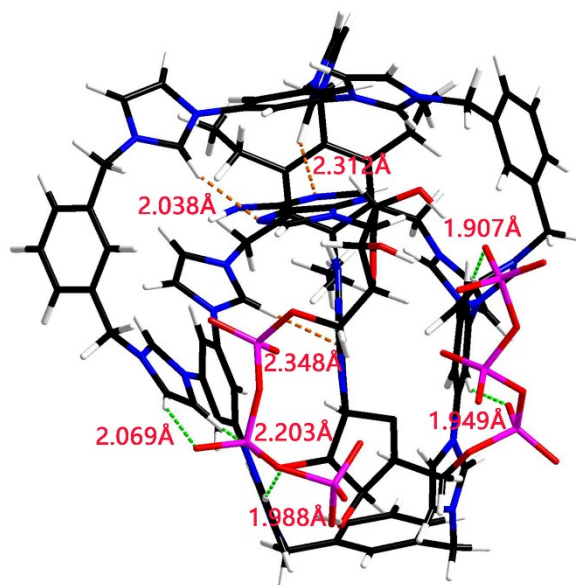

**Fig. S26** The hydrogen bonds between the imidazolium C-H sites of host and the adenine and phosphate groups of guests. Structure was optimized using DFT B3LYP-D3(BJ)/6-31G(d) with the default solvation model in water by Gaussian 16.

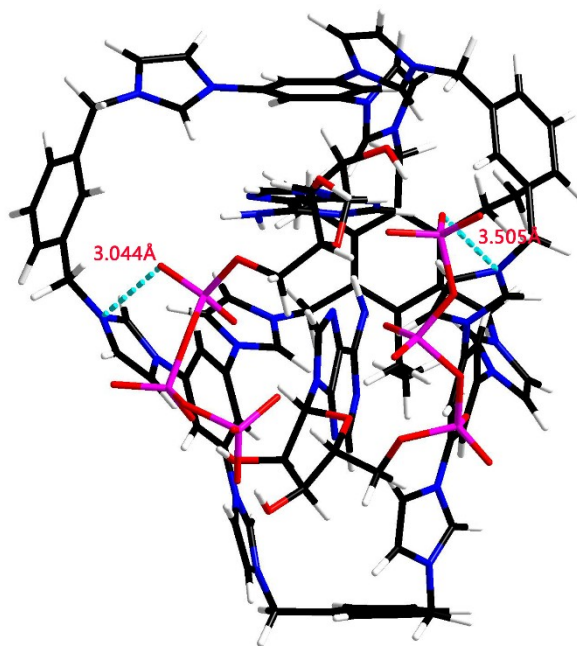

**Fig. S27** The electrostatic interactions between the imidazolium rings of host and the phosphate groups of guests in the energy-minimized structure of  $1 \supset \text{ATP}_2$ . Structure was optimized using DFT B3LYP-D3(BJ)/6-31G(d) with the default solvation model in water by Gaussian 16.



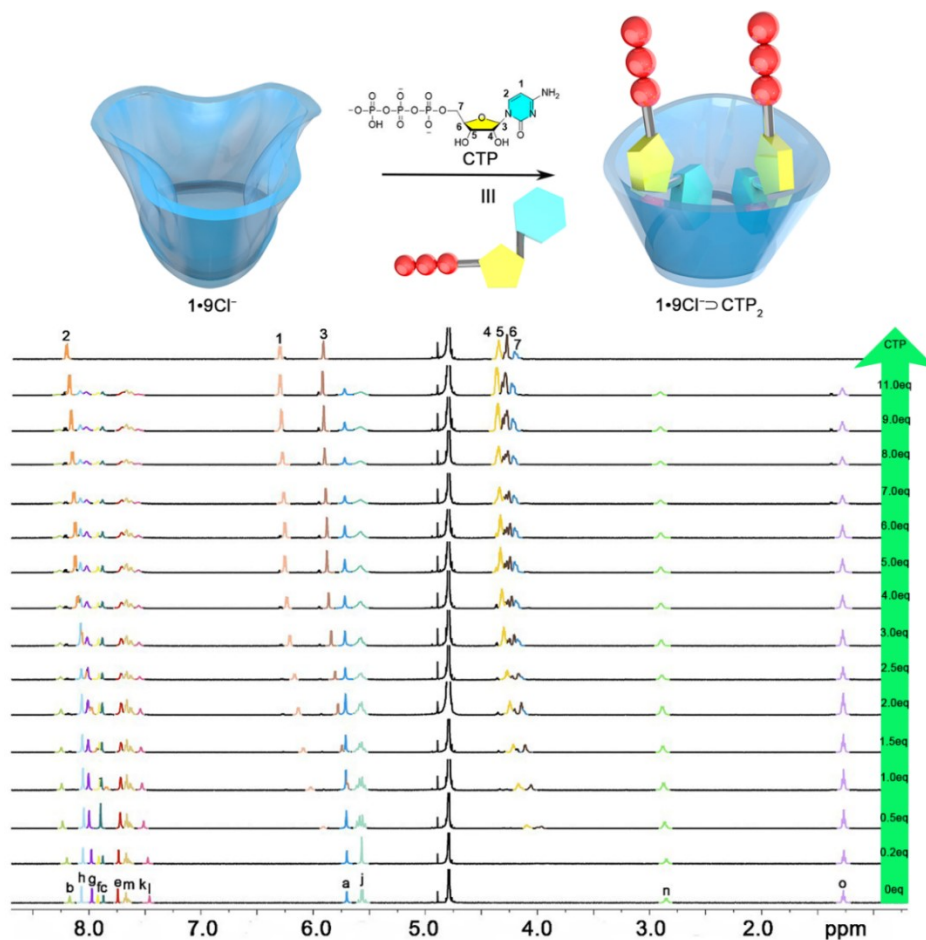

**Fig. S30**  $^1\text{H}$  NMR titration (600 MHz, RT,  $\text{D}_2\text{O}$ ) of  $1\cdot 9\text{Cl}^-$  (1.0 mM) titrated by CTP (0-11.0 equiv).

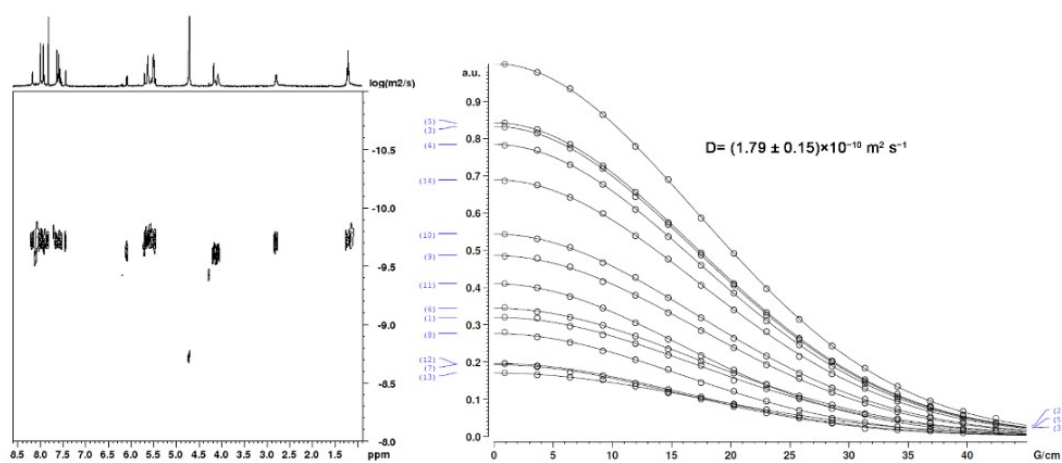

**Fig. S31** DOSY spectrum (400 MHz, RT,  $\text{D}_2\text{O}$ ) of  $1\cdot\text{CTP}_2$  ( $[1\cdot 9\text{Cl}^-]:[\text{CTP}] = 1:2$ ).

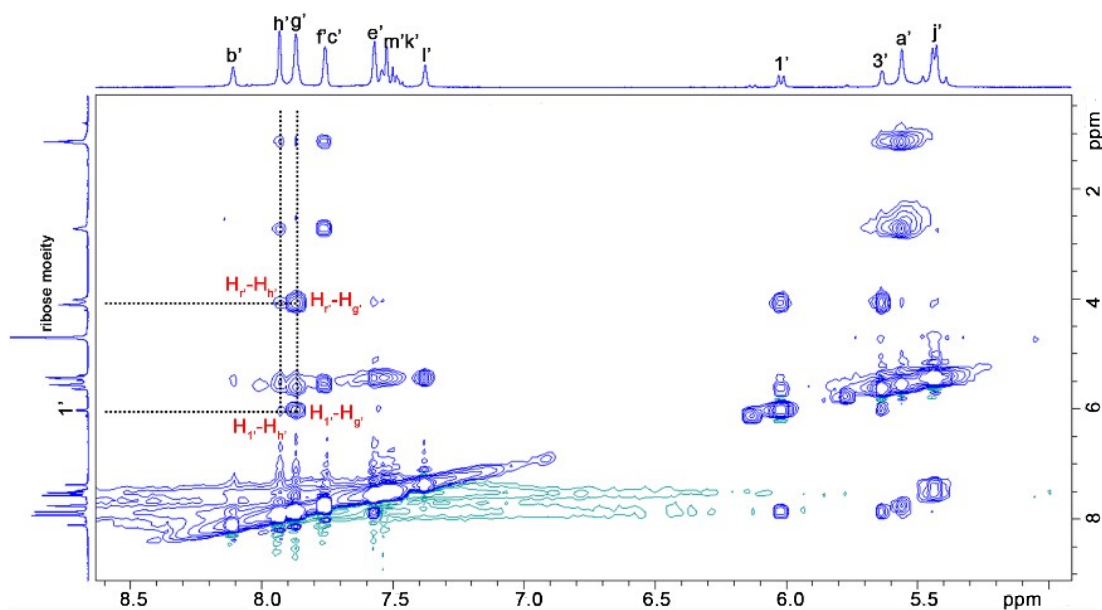

**Fig. S32** NOESY spectrum (400 MHz, RT, D<sub>2</sub>O) of **1**·CTP<sub>2</sub> ([**1**·9Cl<sup>-</sup>]:[CTP] = 1:2).

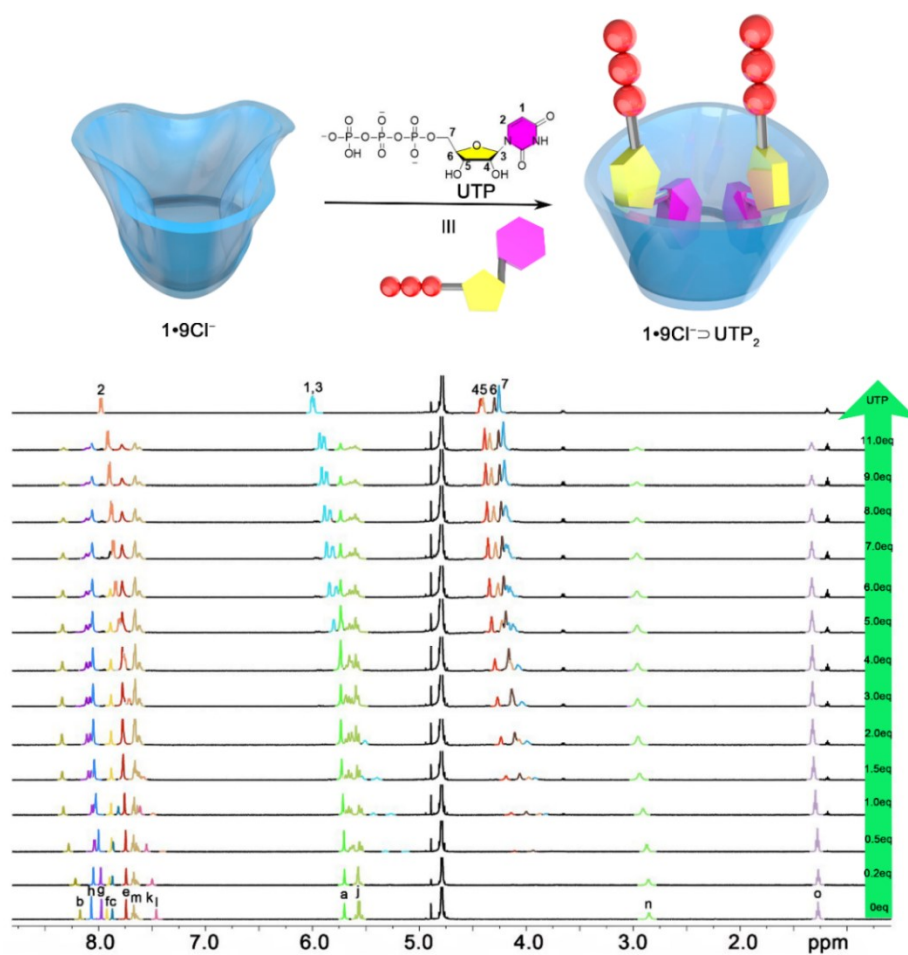

**Fig. S33** <sup>1</sup>H NMR titration (600 MHz, RT, D<sub>2</sub>O) of **1**·9Cl<sup>-</sup> (1.0 mM) titrated by UTP (0-11.0 equiv).

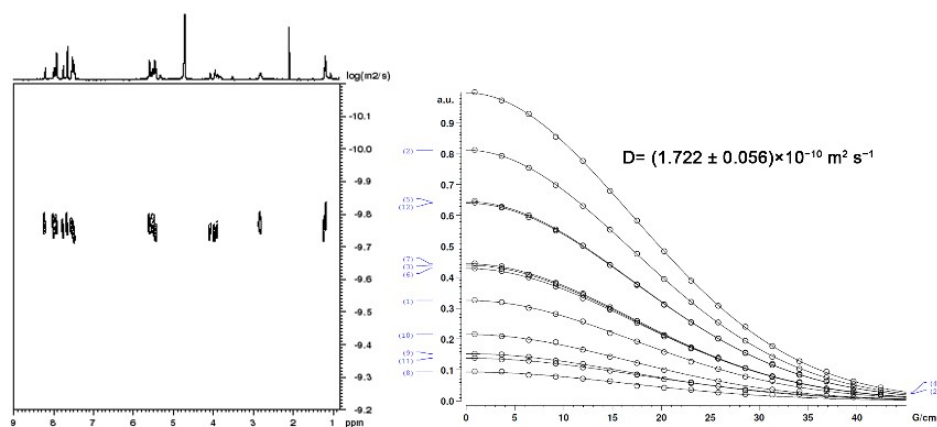

Fig. S34 DOSY spectrum (400 MHz, RT, D<sub>2</sub>O) of 1⊃UTP<sub>2</sub> ([1•9Cl<sup>-</sup>]:[UTP] = 1:2).

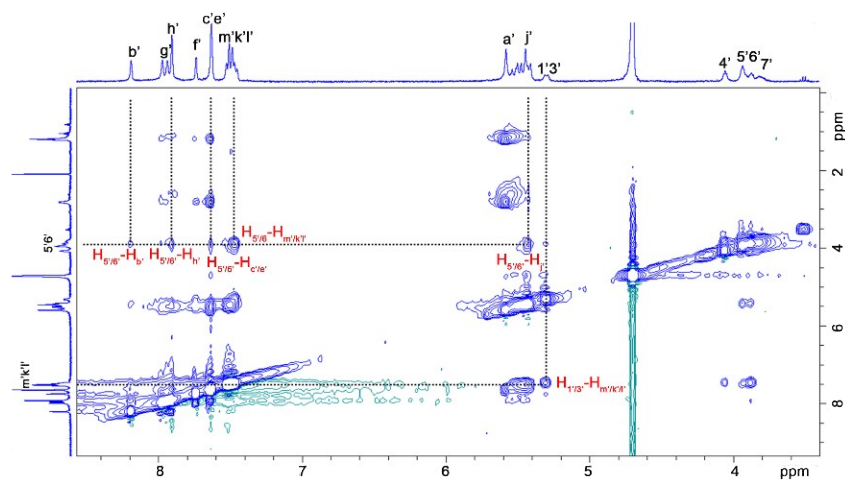

Fig. S35 NOESY spectrum (400 MHz, RT, D<sub>2</sub>O) of 1⊃UTP<sub>2</sub> ([1•9Cl<sup>-</sup>]:[UTP] = 1:2).



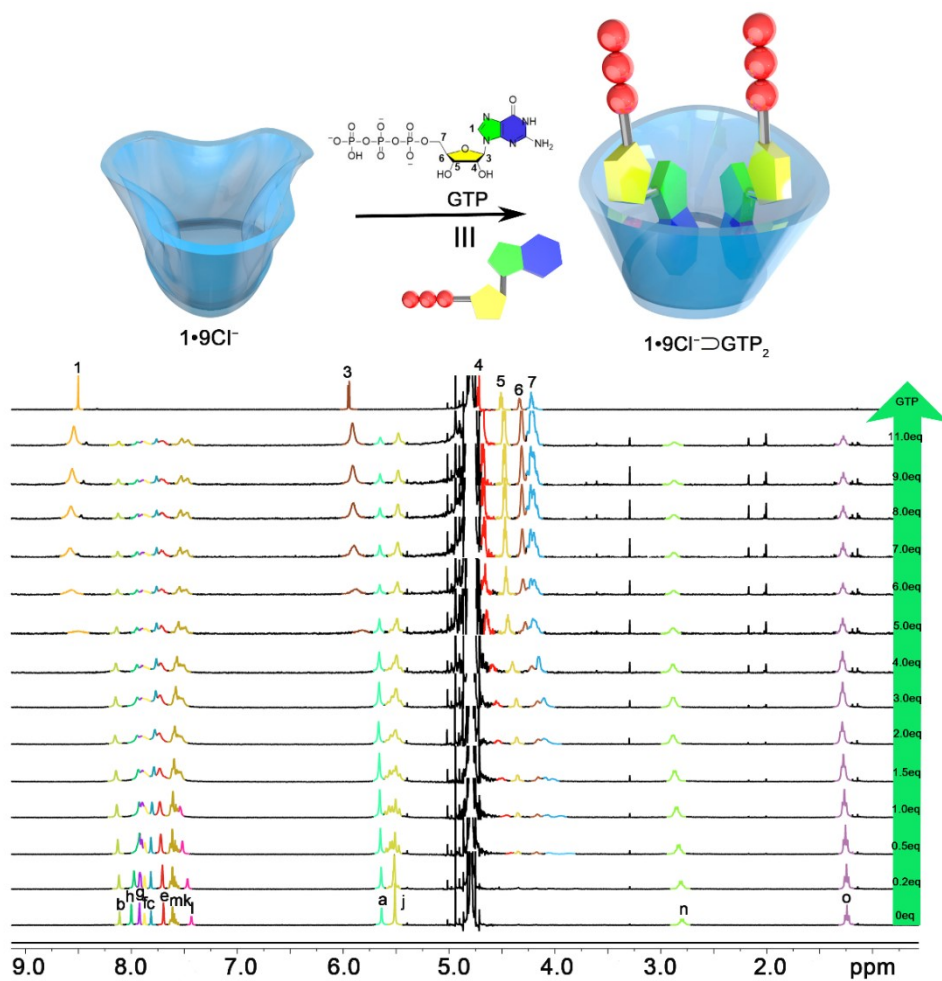

**Fig. S36**  $^1\text{H}$  NMR titration (400 MHz, RT,  $\text{D}_2\text{O}$ ) of  $1\cdot 9\text{Cl}^-$  (1.0 mM) titrated by GTP (0-11.0 equiv).

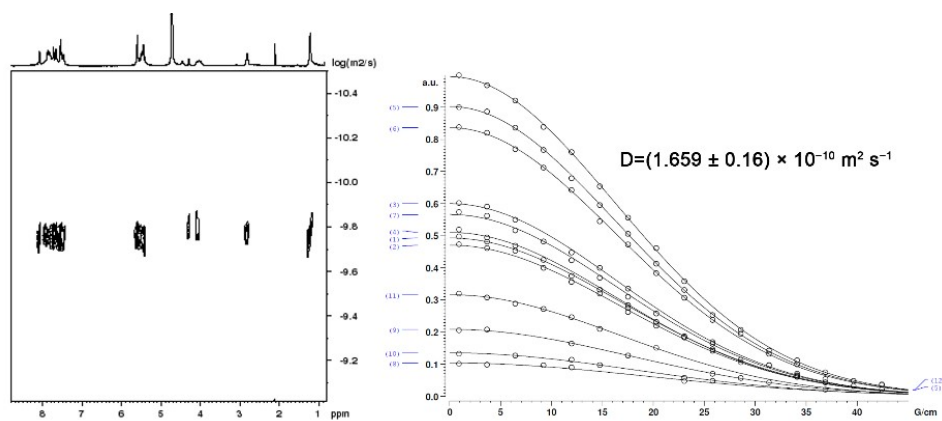

**Fig. S37** DOSY spectrum (400 MHz, RT,  $\text{D}_2\text{O}$ ) of  $1\supset\text{GTP}_2$  ( $[1\cdot 9\text{Cl}^-]:[\text{GTP}] = 1:2$ ).

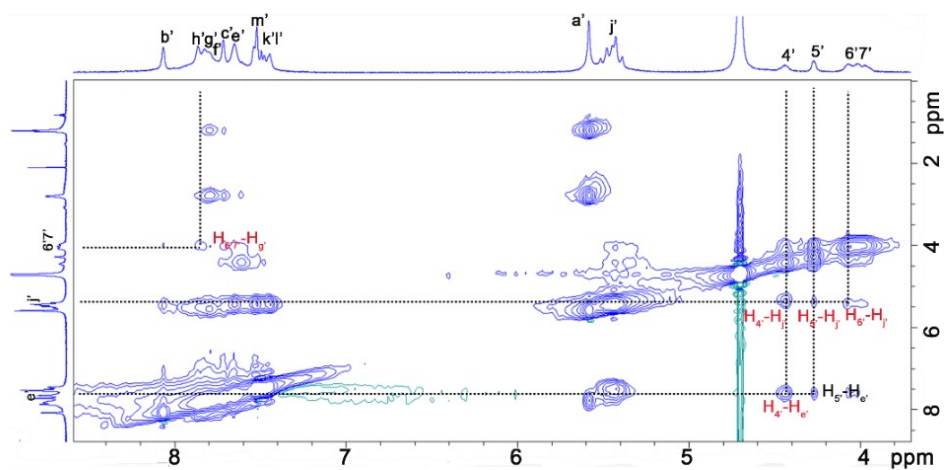

**Fig. S38** NOESY spectrum (400 MHz, RT, D<sub>2</sub>O) of **1•GTP<sub>2</sub>** (**[1•9Cl<sup>-</sup>]:[GTP] = 1:2**).

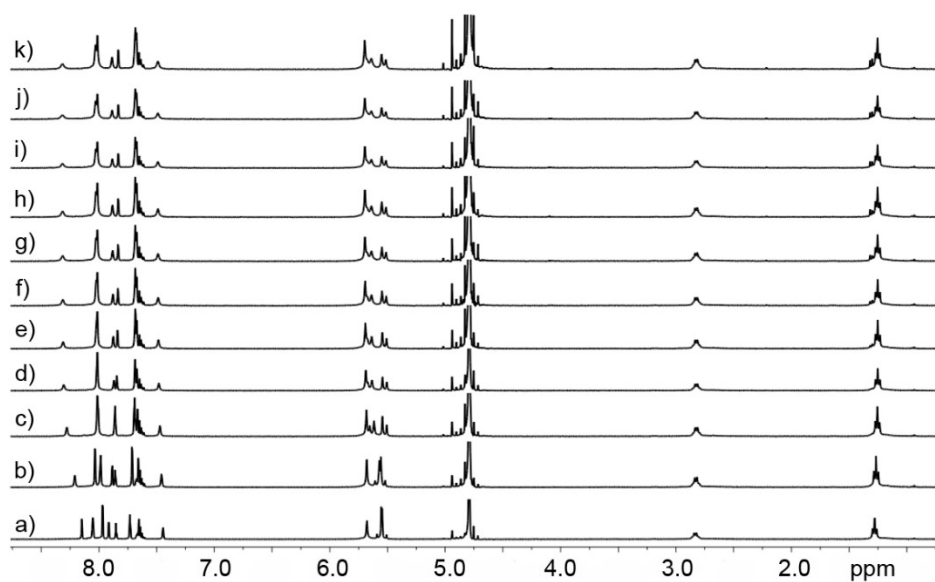

**Fig. S39** <sup>1</sup>H NMR titration (400 MHz, RT, D<sub>2</sub>O) of (a) **1•9Cl<sup>-</sup>** (0.8 mM); (b-k) 0.25-6.0 equiv of pyrophosphate.

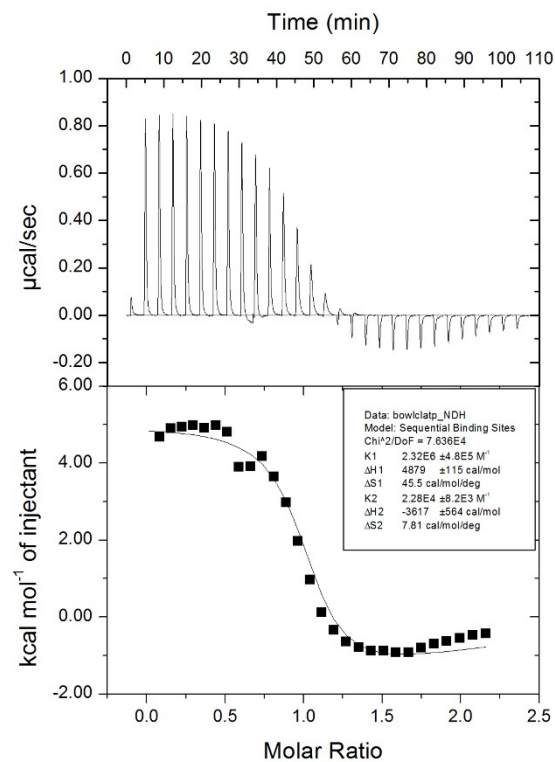

**Fig. S40** ITC titration of **1•9Cl<sup>-</sup>** (0.05 mM) with ATP (0.75 mM) in aqueous solution.

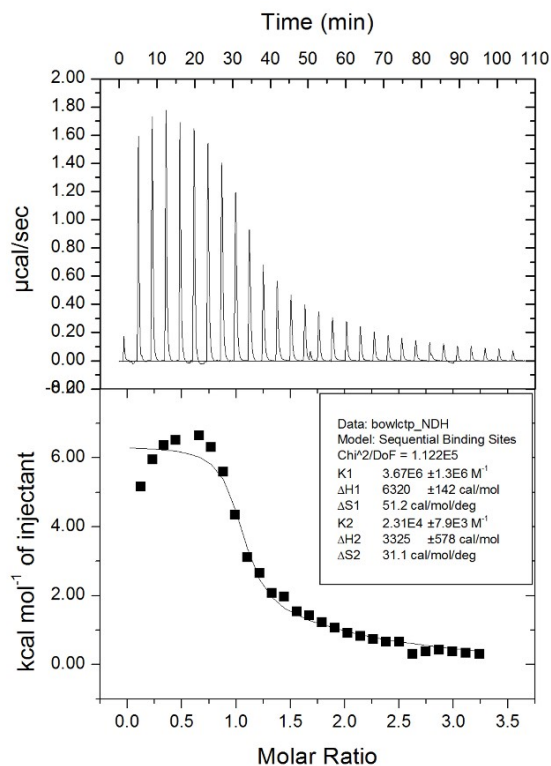

**Fig. S41** ITC titration of **1•9Cl<sup>-</sup>** (0.05 mM) with CTP (0.75 mM) in aqueous solution.

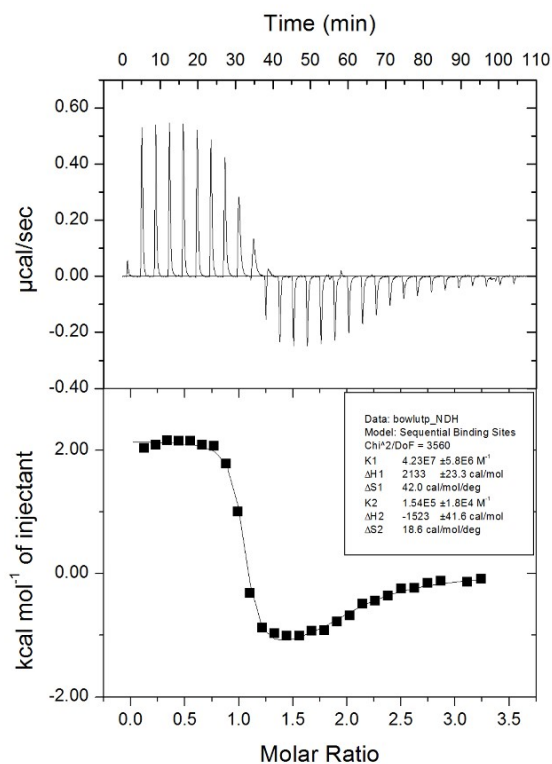

**Fig. S42** ITC titration of  $1 \cdot 9\text{Cl}^-$  (0.05 mM) with UTP (0.75 mM) in aqueous solution.

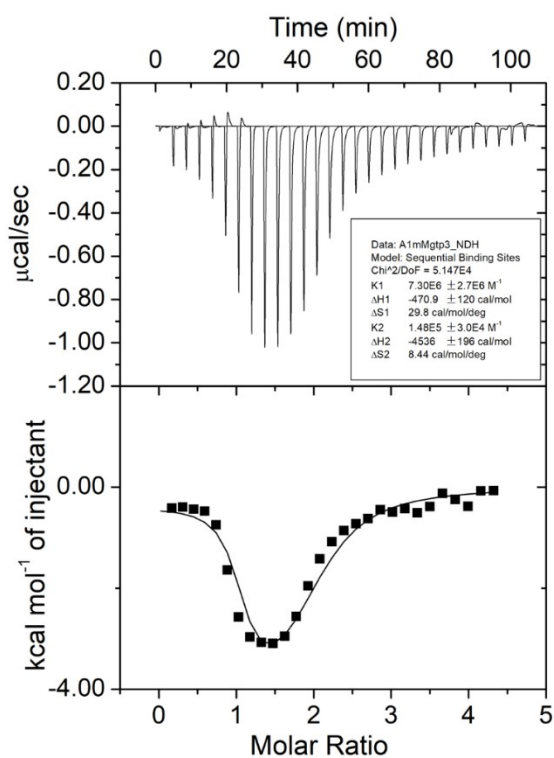

**Fig. S43** ITC titration of  $1 \cdot 9\text{Cl}^-$  (0.05 mM) with GTP (0.75 mM) in aqueous solution.

**Table S3** The calculated binding constants ( $K_a$ ) of  $1\cdot 9Cl^-$  with nucleotides from ITC data in water.

| Anion | Stoichiometry<br>(Host:Guest) | $K_1/M^{-1}$                | $K_2/M^{-1}$                |
|-------|-------------------------------|-----------------------------|-----------------------------|
| ATP   | 1:2                           | $(2.32\pm 0.48)\times 10^6$ | $(2.28\pm 0.82)\times 10^4$ |
| CTP   | 1:2                           | $(3.67\pm 0.13)\times 10^6$ | $(2.31\pm 0.79)\times 10^4$ |
| UTP   | 1:2                           | $(4.23\pm 0.58)\times 10^7$ | $(1.54\pm 0.18)\times 10^5$ |
| GTP   | 1:2                           | $(7.30\pm 2.37)\times 10^6$ | $(1.48\pm 0.30)\times 10^4$ |

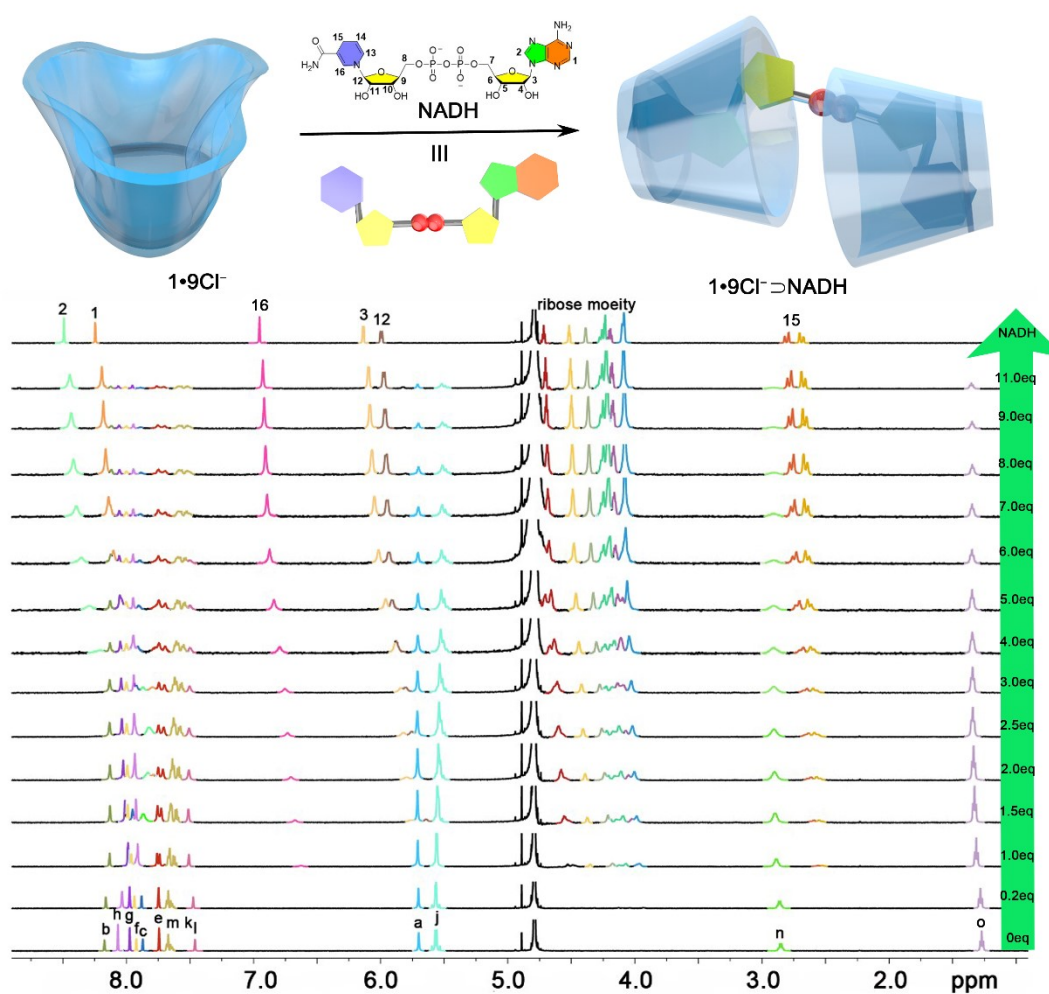

**Fig. S44**  $^1H$  NMR titration (400 MHz, RT,  $D_2O$ ) of  $1\cdot 9Cl^-$  (1.0 mM) titrated by NADH (0-11.0 equiv).

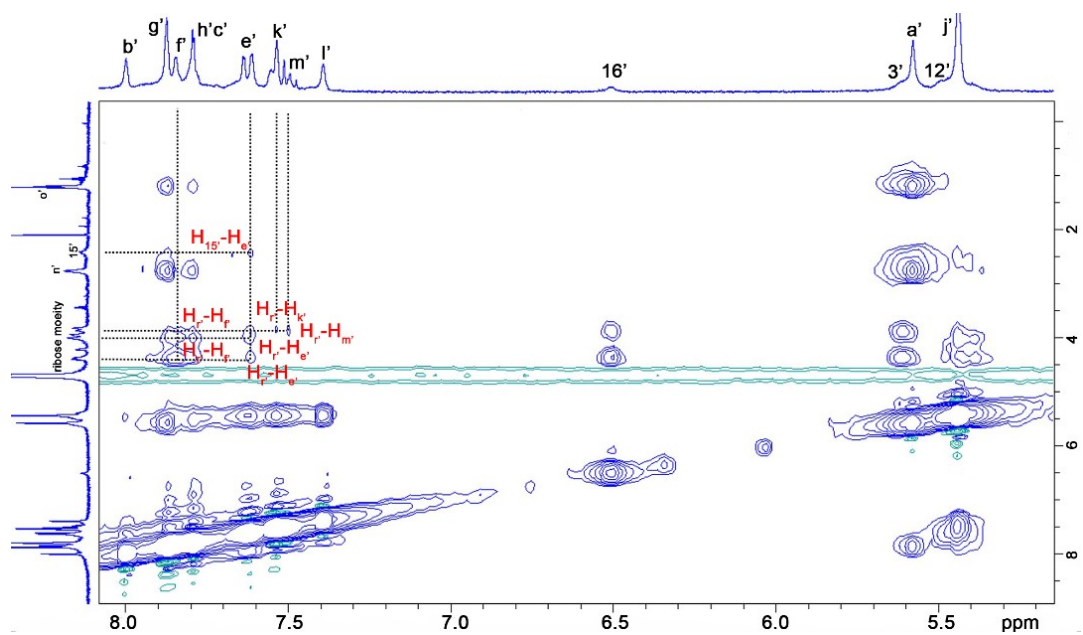

**Fig. S45** NOESY spectrum (400 MHz, RT, D<sub>2</sub>O) of 1<sub>2</sub>D-NADH ([1•9Cl<sup>-</sup>]:[NADH] = 2:1).

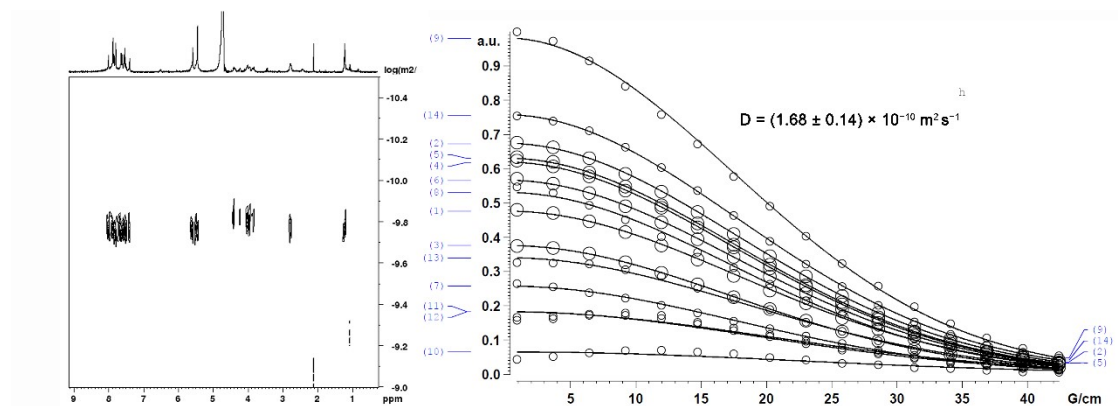

**Fig. S46** DOSY spectrum (400 MHz, RT, D<sub>2</sub>O) of 1<sub>2</sub>D-NADH ([1•9Cl<sup>-</sup>]:[NADH] = 2:1).
